# **A meta-analysis of mesophyll conductance to CO<sub>2</sub> in relation to major abiotic stresses in poplar species**

Raed Elferjani<sup>1, (\*)</sup>, Lahcen Benomar<sup>2, (\*) (\*\*)</sup>, Mina Momayyezi<sup>3</sup>, Roberto Tognetti<sup>4</sup>, Ülo Niinemets<sup>5</sup>, Raju Y. Soolanayakanahally<sup>6</sup>, Guillaume Thérout-Rancourt<sup>7</sup>, Tiina Tosens<sup>5</sup>, Mebarek Lamara<sup>2</sup>, Francesco Ripullone<sup>8</sup>, Simon Bilodeau-Gauthier<sup>9</sup>, Mohammed S. Lamhamedi<sup>9</sup>, Carlo Calfapietra<sup>10</sup>

1 Réseau Reboisement Ligniculture Québec, Université TÉLUQ, Montréal, QC H2S 3L5, Canada

2 Forest Research Institute, University of Québec in Abitibi-Témiscamingue, Rouyn-Noranda, QC, J9X 5E4, Canada

3 Department of Viticulture and Enology, University of California, Davis, CA95616 USA

4 Università degli Studi del Molise, Via De Sanctis, 86100, Campobasso, Italy

5 Estonian University of Life Sciences, Kreutzwaldi 1, 51006 Tartu, Estonia

6 Indian Head Research Farm, Agriculture and Agri-Food Canada, Indian Head, SK, S0G 2K0, Canada

7 Institute of Botany, University of Natural Resources and Life Sciences, Gregor-Mendel-Strasse 33, 1180 Vienna, Austria

8 University of Basilicata, Via Ateneo Lucano 10, 85100 Potenza, Italy

9 Direction de la recherche forestière, 2700 rue Einstein, Québec, QC, G1P 3W8, Canada

10 Institute of Agro-Environmental & Forest Biology (IBAF), National Research Council (CNR), Via Marconi 2, Porano (TR) 05010, Italy

(\*) RE and LB have equally contributed to writing of the manuscript and are joint first-authors.

(\*\*) Corresponding author: [lahcen.benomar.1@gmail.com](mailto:lahcen.benomar.1@gmail.com)

## 30 **Highlight**

31 Our meta-analysis on the variation of mesophyll conductance under abiotic stresses  
32 shows a noticeable response to light gradient, soil moisture and nitrogen availability and  
33 a significant relationship with specific leaf area

34

## Abstract

Mesophyll conductance ( $g_m$ ) determines the diffusion of  $\text{CO}_2$  from the substomatal cavities to the site of carboxylation in the chloroplasts and represents a critical limiting factor to photosynthesis. In this study, we evaluated the average effect sizes of different environmental constraints on  $g_m$  in *Populus* spp., a forest tree model. We collected raw data of 815  $A-C_i$  response curves from 26 datasets to estimate  $g_m$ , using a single curve-fitting method to alleviate method-related bias. We performed a meta-analysis to assess the effects of different abiotic stresses on  $g_m$ . We found a significant increase in  $g_m$  from the bottom to the top of the canopy that was concomitant with the increase of maximum rate of carboxylation and light-saturated photosynthetic rate ( $A_{\max}$ ).  $g_m$  was positively associated with increases in soil moisture and nutrient availability, but insensitive to increasing soil copper concentration, and did not vary with atmospheric  $\text{CO}_2$  concentration. Our results showed that  $g_m$  was strongly related to  $A_{\max}$  and to a lesser extent to stomatal conductance ( $g_s$ ). Also, a negative linear relation was obtained between  $g_m$  and specific leaf area, which may be used to scale-up  $g_m$  within the canopy.

## Key words

$A-C_i$  curve, abiotic stress, mesophyll conductance, meta-analysis, photosynthesis, poplar

# Introduction

Carbon assimilation of plants is importantly determined by the diffusion efficiency of CO<sub>2</sub> from the atmosphere to the site of carboxylation. The rate of CO<sub>2</sub> diffusion is affected by two main diffusion limitations. The first limitation controls the CO<sub>2</sub> flux from the atmosphere to the sub-stomatal cavities through the stomata and is characterized by stomatal conductance ( $g_s$ ). The second limitation determines the diffusion of CO<sub>2</sub> from the substomatal cavities to the sites of carboxylation in the chloroplasts and is characterized by mesophyll conductance ( $g_m$ ).  $g_m$  is composed of gaseous and liquid phase resistances (Flexas et al., 2008; Evans et al., 2009; Niinemets et al., 2009). CO<sub>2</sub> diffusion inside the leaves is complex, facing a series of structural barriers coupled with biochemical regulations. It has been shown that  $g_m$  is typically limited by liquid phase conductance both in species with soft mesophytic leaves as well as in species with tough xerophytic leaves (Tomás et al., 2013; Tosens et al., 2012a,b). The liquid phase is a multi-components pathway that involves the mesophyll cell wall thickness and porosity, the plasmalemma, the chloroplast envelope, the chloroplast thickness and the mesophyll surface area exposed to intercellular air spaces per unit of leaf area (Evans et al., 2009; Tosens et al., 2012b; Tomás et al., 2013). After extensive study during the last two decades,  $g_m$  is now widely accepted as a critical limiting factor to photosynthesis, which has to be considered in characterizing plant carbon gain potentials and responses to future climate change (Evans et al., 2009; Niinemets et al., 2009; Niinemets et al., 2011; Flexas et al., 2016).

Mesophyll conductance has been shown to respond to environmental stress and may govern functional plasticity of photosynthesis and plant fitness under limited resources

(Galle et al., 2009; Barbour et al., 2010; Buckley and Warren, 2014; Th  roux-Rancourt et al., 2015; Flexas et al., 2016; Shrestha et al., 2018). However, recent findings on the response of  $g_m$  to abiotic stress are conflicting and inconclusive, demonstrating the complex nature of  $g_m$  variation (Flexas et al., 2008; Niinemets et al., 2009; Zhou et al., 2014; Shrestha et al., 2018). This suggests that the environmental and species-specific response (acclimation) of  $g_m$  to growth conditions should be considered to predict plant performance in the field. Among the contrasting environmental responses, growth temperature may (Warren, 2008; Silim et al., 2010) or may not (Dillaway and Kruger, 2010; Benomar et al., 2018) affect  $g_m$ . Similarly, the increase in soil nitrogen may (Warren 2004; Shrestha et al., 2018; Xu et al., 2020; Zhu et al., 2020) or may not (Bown et al., 2009) stimulate  $g_m$ . The magnitude of decrease in  $g_m$  under water stress and low light differed among studies (Warren et al., 2003; Niinemets et al., 2006; Montpied et al., 2009; B  gelein et al., 2012; Tosens et al., 2012a; Zhou et al., 2014; Peguero-Pina et al., 2015; Th  roux Rancourt et al., 2015). These discrepancies among studies result in part from (i) the absolute changes in anatomical, morphological (mesophyll structure) and biochemical (aquaporins and carbonic anhydrase) traits controlling  $g_m$ , as well as from changes in the relative contribution of these traits (Marchi et al., 2008; Tom  s et al., 2013), and from (ii) the level of coordination between  $g_m$ ,  $g_s$  and leaf-specific hydraulic conductivity ( $K_L$ ) (Flexas et al., 2013; Th  roux-Rancourt et al., 2014; Xiong et al., 2017). Given the complex interplay between different factors controlling  $g_m$ , it is important to examine its acclimation at the genus and species level to gain a general insight into the mechanistic basis of changes in  $g_m$ .

Five methods exist to estimate  $g_m$ : a) chlorophyll fluorescence coupled to gas exchange (Harley et al., 1992), (b) carbon isotope discrimination coupled to gas exchange (initially developed by Evans et al., 1986), c) oxygen isotope discrimination (Barbour et al., 2016), (d)  $A-C_i$  curve fitting (Ethier and Livingston, 2004; Sharkey et al., 2007), and (e) 1D modeling of  $g_m$  from leaf structural characteristics (Evans et al., 2009, Tosens et al., 2012b, Tomas et al., 2013). All of these methods are based on assumptions and each one has its limitations (Flexas et al., 2013; Tosens and Laanisto, 2018). The standard deviation of the estimate of  $g_m$  may vary from 10% to 40%, which may limit our understanding of  $g_m$  acclimation to growth conditions, particularly when the variation between treatments or studies is less than the error of estimates (Sun et al., 2014a).

*Populus* spp., model crops in forestry characterized by high yield potential, have been the subject of numerous studies to understand the physiological response to environmental factors but research is still necessary to make assessment of effects sizes and to draw generalizations (Larocque et al., 2013). A general understanding of the  $CO_2$  pathway through mesophyll and how it is affected by environmental factors would be beneficial in the efforts to (i) accurately predict canopy photosynthesis under different environmental conditions, particularly under warmer and drier climate, and improve global carbon assimilation models and (ii) develop and effectively select more resilient and productive cultivars for wood, bioenergy and bioremediation. Substantial data of  $A-C_i$  response curves in the literature has been used to estimate photosynthetic parameters, not to estimate  $g_m$ , and such compiled dataset would provide a basis to make such assessments on the response of  $g_m$  to the environment.

In this study, we compiled 815  $A-C_i$  response curves from 26 datasets of different poplar species and hybrids (Table 1). Published  $A-C_i$  curve-fitting approaches differ broadly regarding the rectangularity of the hyperbola, segmentations of the model of photosynthesis and determination of the transition value of  $CO_2$  from carboxylation to electron transport (Harley et al., 1992; Ethier and Livingston, 2004; Manter and Kerrigan 2004; Dubois et al., 2007; Sharkey et al., 2007; Pons et al., 2009; Gu et al., 2010). These approaches led to different fitted values (Miao et al., 2009, Sun et al., 2014a). Although  $A-C_i$  curve fitting is unreliable for species with large  $g_m$ , it can provide results similar to those obtained from direct measurements for species with medium to low  $g_m$  (Niinemets et al., 2005, 2006; Qiu et al., 2017; Xu et al., 2020). Using the compiled  $A-C_i$  response curves, we performed curve fitting using a single method (Ethier and Livingston, 2004) to alleviate the fitting method bias and to obtain uniformed estimates of  $g_m$ , maximum rate of carboxylation ( $V_{cmax}$ ) and rate of electron transport ( $J$ ). We further collected related variables like leaf nitrogen content, stomatal conductance and specific leaf area (SLA) when data were available. Our main goal was to find trends in the response of mesophyll conductance to prevalent abiotic stressors and to examine the relationship between  $g_m$  and other leaf physiological and morphological traits. We believe that a meta-analytical approach to analyze the accumulated data on the diffusion of  $CO_2$  through the mesophyll diffusion pathway in relation to other photosynthesis-related traits provides key insight into physiological and structural controls on mesophyll conductance and into the environmental plasticity of mesophyll conductance. We aim at contributing to the efforts of improving poplar photosynthetic

efficiency in poplar breeding programs, and at improving modelling of global carbon assimilation of biomass and bioenergy crops under climate change.

## Materials and methods

### Data collection

Data were collected by a web search in Web of Science, Scopus, and Google Scholar using the following key words: (“*Populus*” or “poplar” or “hybrid poplar” or “aspen”) and (“ $V_{cmax}$ ” or “maximum rate of electron transport ( $J_{max}$ )” or “mesophyll conductance”). At this step, abstract of every item was checked to confirm the paper is actually about  $g_m$ . Then, we looked at the materials and methods section of selected papers where  $A-C_i$  response curves of *Populus* spp. were measured.

To get raw data of  $A-C_i$  response curves, we contacted the corresponding authors or co-authors of the targeted studies by e-mail and via ResearchGate. We obtained 23 data sets from published studies and three data sets from unpublished studies (Table 1). Collectively, they provided a total of 815  $A-C_i$  response curves.

The total data of 72 genotypes were collected from measurements on plants growing in plantations (5 studies), or under controlled conditions (greenhouse or growth chamber setups; 21 studies) with optimal and stressful conditions (Table 1). After compiling all  $A-C_i$  curves, the quality of the data was assessed based on the following criteria: 1) only curves with at least 2 points in the saturation region ( $J$  region) were retained; 2) only curves with  $P < 0.05$  for the p-value of fitted curves using the method of Ethier and Livingston (2004) were retained; Consequently, 65 curves that did not meet these conditions were removed; and 3) based on the literature,  $g_m$  values in *Populus* spp.



using at least two methods simultaneously never exceeded  $1 \text{ mol m}^{-2} \text{ s}^{-1}$  (Singsaas et al., 2004; Flexas et al., 2008; Velikova et al., 2011; Tosens et al., 2012a; Thérour-Rancourt et al., 2014; Momayyezi and Guy, 2017; Xu et al., 2020). Then,  $g_m > 1 \text{ mol m}^{-2} \text{ s}^{-1}$  were considered as non-available data (94 entries), and  $V_{\text{cmax}}$  and  $J$  values retained for further analyses. Furthermore, fewer data point and/or large interval in the intracellular concentration of  $\text{CO}_2$  ( $C_i \text{ } \mu\text{mol mol}^{-1}$ ) in the RuBisCO limited phase region are the major source of error and probability of failing  $g_m$  (reached the set bound during the grid search) frequently encountered during  $A-C_i$  curve fitting (Warren, 2006; Miao et al., 2009, Sun et al., 2014a; Moualeu-Ngangue et al., 2016).

## Data subsets

To examine the effect of a given abiotic factor on  $g_m$ , we estimated that a minimum of three studies is necessary to have reliable conclusions, regardless of the genotype used. Then, we could come up with subsets of data that focused on the same variable and performed analyses on them separately (identified in the column 'treatment' in Table 1). Our first goal was to examine the effect of variations in these factors on  $g_m$ , light-saturated photosynthetic rate ( $A_{\text{max}}$ ),  $g_s$ ,  $J$ ,  $V_{\text{cmax}}$  and in a second step, the relationships between  $g_m$  and other photosynthetic characteristics ( $A_{\text{max}}$ ,  $g_s$ ,  $J$ ,  $V_{\text{cmax}}$ ). The data subsets included the following environmental factors:

- Canopy level: four studies addressed the photosynthetic activity of leaves at the bottom, middle and top of trees (Niinemets et al., 1998; Merilo et al., 2010; Calfapietra et al., 2005; Benomar, 2012).
- Ambient  $\text{CO}_2$ : we examined the response of trees to elevated ambient  $\text{CO}_2$  from Calfapietra et al. (2005), Merilo et al. (2010) and Tissue et al. (2010). We

considered 370 ppm as the control treatment in the three studies, while the elevated CO<sub>2</sub> was 550 ppm of CO<sub>2</sub> for the studies of Calfapietra et al. (2005) and Merilo et al. (2010), and 700 ppm for the study of Tissue et al. (2010).

- Copper stress: data sets from studies of Borghi et al. (2007) and Borghi et al. (2008) were used to examine the response of poplar trees to contamination of the substrate with copper (Cu). Treatments were assigned to three levels of Cu: 0 (0 to 0.4 µM), 20 (20 to 25 µM) and 75 (75 to 100 µM).
- Soil nitrogen (N) content: High vs. low soil N content treatments were reported in four studies: Benomar et al. (2018), Ripullone et al. (2003), Calfapietra et al. (2005) and Xu et al. (2020). In Merilo et al. (2010), no effect of nitrogen fertilization was observed by authors due to high background nutrient availability in the plantation site.
- Soil moisture: water status of trees was assessed and data from four studies was classified into two treatments: control (optimal watering) vs. water deficit (Tosens et al., 2012a; Li et al., 2012; Thérout-Rancourt, unpublished; Benomar et al., unpublished).

For Xu et al. (2020), we extracted data from the article (means and standard errors) and generated three replicates assuming a normal distribution using SURVEYSELECT procedure of SAS (SAS Institute, software version 9.4, Cary, NC, USA). The reason is that the authors used the same curve fitting approach (Ethier and Livingston 2004) we used in the meta-analysis (Table 1).

For studies with two or more investigated factors, we considered the different levels of the factor of interest and the control level of the rest of factors to avoid between-factors

interaction effects on results. For example, in Calfapietra et al. (2005), trees were subject to different levels of N and CO<sub>2</sub>. When we focused on the effect of N, we selected trees exposed to ambient CO<sub>2</sub> only (control).

## Curve analysis

Mesophyll conductance and photosynthetic capacity variables,  $V_{\text{cmax}}$  and  $J$ , were estimated by fitting  $A-C_i$  curve with the non-rectangular hyperbola version of the biochemical model of C<sub>3</sub> plants (Farquhar et al., 1980). The model was fitted using non-linear regression techniques (Proc NLIN, SAS) following Dubois et al. (2007) and Sun et al. (2014a).

Briefly, the net assimilation rate ( $A_n$ ) is given as:

$$A_n = \min \{A_c, A_j\} \quad (1)$$

with

$$A_c = V_{\text{cmax}} \frac{(C_c - \Gamma^*)}{C_c + K_c \left(1 + \frac{O}{K_o}\right)} - R_{\text{day}} \quad (2)$$

$$A_j = J \frac{C_c - \Gamma^*}{4(C_c + 2\Gamma^*)} - R_{\text{day}} \quad (3)$$

$$C_c = C_i - \frac{A_n}{g_m} \quad (4)$$

where  $V_{\text{cmax}}$  is the maximum rate of carboxylation ( $\mu\text{mol m}^{-2} \text{s}^{-1}$ ),  $O$  is the partial atmospheric pressure of O<sub>2</sub> ( $\text{mmol mol}^{-1}$ ),  $\Gamma^*$  is the CO<sub>2</sub> compensation point in the absence of mitochondrial respiration,  $R_{\text{day}}$  is mitochondrial respiration in the light ( $\mu\text{mol CO}_2 \text{ m}^{-2} \text{s}^{-1}$ ),  $C_c$  is the chloroplast CO<sub>2</sub> ( $\mu\text{mol mol}^{-1}$ ),  $C_i$  is the intercellular air space concentration of CO<sub>2</sub> ( $\mu\text{mol mol}^{-1}$ ),  $K_c$  ( $\mu\text{mol mol}^{-1}$ ) and  $K_o$  ( $\text{mmol mol}^{-1}$ ) are the Michaelis–Menten constants of RuBisCO for CO<sub>2</sub> and O<sub>2</sub>, respectively,  $J$  is the rate of electron transport ( $\mu\text{mol m}^{-2} \text{s}^{-1}$ ). The values at 25 °C used for  $K_c$ ,  $K_o$  and  $\Gamma^*$  were

$\mu\text{mol mol}^{-1}$ ,  $166 \text{ mmol mol}^{-1}$  and  $37.4 \mu\text{mol mol}^{-1}$ , respectively (Sharkey et al., 2007) and their temperature dependencies were as in Sharkey et al. (2007).

In four data sets, measurements were carried out under a temperature that was different from the reference ( $25^\circ\text{C}$ ). In this case,  $V_{\text{cmax}}$  and  $J$  were normalized to  $25^\circ\text{C}$  using the model of Kattge and Knorr (2007), which integrates the acclimation to growth temperature. However, the actual values of  $V_{\text{cmax}}$  and  $J$  were more often significant compared to normalized values, and this was true using both ANOVA and regression.

## Statistical analyses

Data analysis assessing the effect of the environmental factors on  $g_m$  and the relationship between  $g_m$  and the other traits were carried out using SAS software (SAS Institute, software version 9.4, Cary, NC, USA).

When at least three studies focused on one factor (nitrogen,  $\text{CO}_2$ , canopy level, copper), the effect of treatments on light-saturated photosynthetic rate ( $A_{\text{max}}$ ),  $g_m$ , and  $g_s$  was assessed, separately for each response variable, through mixed model analyses of variance using the primary data (Riley et al., 2010; Mengersen et al., 2013). “Treatment” was the fixed effect while “study” and “genotype” nested within study were the random effects. The number of replicates was not necessarily balanced across treatments. The assumptions of normality of the residuals and homogeneity of variance were verified, and a log-transformation was made when necessary.

## Results

The number of studies on mesophyll conductance has rapidly increased since 2000, and more remarkably since 2013 (Fig. 1), suggesting a growing interest among plant

ecophysiologicals to understand the role of  $g_m$  in photosynthesis. This pattern was very similar to the increase of publication number on mesophyll conductance in *Populus* spp. (Fig. 2).

### Canopy level

Light-saturated photosynthetic rate at an ambient  $CO_2$  concentration (380-400  $\mu\text{mol mol}^{-1}$ ),  $A_{\text{max}}$ , significantly increased from  $7.1 \pm 0.44 \mu\text{mol m}^{-2} \text{s}^{-1}$  on average at the bottom leaves to  $13.0 \pm 0.45 \mu\text{mol m}^{-2} \text{s}^{-1}$  at the mid-canopy, to  $16.2 \pm 0.53 \mu\text{mol m}^{-2} \text{s}^{-1}$  at the upper canopy (Fig. 3a). Similar to  $A_{\text{max}}$ ,  $g_m$  had an ascending pattern, from the bottom ( $0.12 \pm 0.01 \text{ mol } CO_2 \text{ m}^{-2} \text{s}^{-1}$ ) to the top of the canopy ( $0.24 \pm 0.02 \text{ mol m}^{-2} \text{s}^{-1}$ ) (Fig. 3c). Stomatal conductance ( $g_s$ ) was the lowest at the bottom canopy ( $0.17 \pm 0.01 \text{ mol H}_2\text{O m}^{-2} \text{s}^{-1}$ ) and then increased to  $0.36 \pm 0.02 \text{ mol H}_2\text{O m}^{-2} \text{s}^{-1}$  at the mid and the upper canopy (Fig. 3b). The  $g_m/g_s$  ratio was significantly greater at the upper canopy ( $1.17 \pm 0.1$ ), compared to the mid-canopy leaves ( $0.88 \pm 0.1$ ) and was not different everywhere else (Fig. 3d). While,  $V_{\text{cmax}}$  increased similarly to  $A_{\text{max}}$  and  $g_m$  from the bottom to the top of the canopy (Fig. 3e); however, SLA had an opposite trend (Fig. 3f).

### Ambient $CO_2$

Increased air  $CO_2$  had no effect on average  $A_{\text{max}}$  ( $14.43 \pm 0.60 \mu\text{mol m}^{-2} \text{s}^{-1}$ ),  $g_m$  ( $0.21 \pm 0.02 \text{ mol m}^{-2} \text{s}^{-1}$ ) and  $g_m/g_s$  ( $1.09 \pm 0.1$ ) (Fig. 4a, 4b and 4c). However, average  $g_s$  was higher ( $0.40 \pm 0.03 \text{ mol H}_2\text{O m}^{-2} \text{s}^{-1}$ ) under “Ambient”, compared to “Elevated”  $CO_2$  ( $0.32 \pm 0.02 \text{ mol H}_2\text{O m}^{-2} \text{s}^{-1}$ ) (Fig. 4b).

### Copper stress

$A_{\max}$  was not affected when Cu soil concentration increased from 0 to 20 or 75  $\mu\text{M}$  ( $9.67 \pm 0.95 \mu\text{mol m}^{-2} \text{s}^{-1}$ ) (Fig. 5a). It should be noted that at the highest Cu level (75  $\mu\text{M}$ ),  $A_{\max}$  ranged from 4 to 15  $\mu\text{mol m}^{-2} \text{s}^{-1}$ . Average  $g_s$  significantly decreased under medium (20  $\mu\text{M}$ ,  $0.17 \pm 0.02 \text{ mol H}_2\text{O m}^{-2} \text{s}^{-1}$ ), and high Cu treatment (75  $\mu\text{M}$ ,  $0.18 \pm 0.03 \text{ mol m}^{-2} \text{s}^{-1}$ ), compared to control treatment (Fig. 5b). Increasing Cu concentration in soil did not affect  $g_m$  (Fig. 5c). The  $g_m/g_s$  ratio was greater under 20 and 75  $\mu\text{M}$  Cu, compared to control (Fig. 5d).

## Soil nitrogen

$A_{\max}$  was significantly greater ( $16.1 \pm 0.61 \mu\text{mol m}^{-2} \text{s}^{-1}$ ) under the high soil nitrogen (HN, 250 kg N  $\text{ha}^{-1} \text{y}^{-1}$  in field study or 20 mM for pot study), compared to the low nitrogen treatment (LN,  $12.9 \pm 0.65 \mu\text{mol m}^{-2} \text{s}^{-1}$ ) (Fig. 6a). The high supply of nitrogen increased  $g_s$  (from  $0.29 \pm 0.03$  at LN to  $0.36 \pm 0.03 \text{ mol m}^{-2} \text{s}^{-1}$  at HN) and  $g_m$  (from  $0.19 \pm 0.02$  to  $0.23 \pm 0.02 \text{ mol m}^{-2} \text{s}^{-1}$ ), but had no effect on  $g_m/g_s$  ratio ( $1.38 \pm 0.16$  on average) (Fig. 6b, 6c and 6d).

## Soil moisture

Average  $A_{\max}$  decreased by drought (range of leaf predawn water potential under water deficit,  $\Psi_{\text{leaf}} = -0.7$  to  $-0.8$ , soil water content = 10%), dropping from  $17.0 \pm 0.7 \mu\text{mol m}^{-2} \text{s}^{-1}$  to  $14.8 \pm 0.8 \mu\text{mol m}^{-2} \text{s}^{-1}$  on average with minimum value ( $3.8 \mu\text{mol m}^{-2} \text{s}^{-1}$ ) much lower than in watered trees ( $8.9 \mu\text{mol m}^{-2} \text{s}^{-1}$ ) (Fig. 7a). As expected, soil moisture deficit remarkably altered  $g_s$ , decreasing its average value from  $0.33 \pm 0.02 \text{ mol m}^{-2} \text{s}^{-1}$  in control trees to  $0.20 \pm 0.03 \text{ mol m}^{-2} \text{s}^{-1}$  under drought conditions (Fig. 7b). Drought had the same effect on  $g_m$ , but to a lesser extent than  $g_s$ .  $g_m$  decreased from  $0.27 \pm 0.02$  to

0.19±0.02 mol m<sup>-2</sup> s<sup>-1</sup> under soil moisture deficit (Fig. 7c). In addition,  $g_m/g_s$  ratio increased by 37% when plants were subject to a drought (Fig. 7d).

## Relationship between CO<sub>2</sub> diffusion and photosynthetic activity

$A_{max}$  was strongly correlated to both  $g_s$  and  $g_m$  ( $P=0.001$ ) and to  $V_{cmax}$  ( $P=0.001$ ) over all the studies (Fig. 8a, 8b and 8c). Based on the collected data,  $g_m$  was significantly correlated to  $g_s$  ( $P = 0.04$ ). However, the relationship was not linear.  $g_m$  was the highest (0.4-0.5 mmol m<sup>-2</sup> s<sup>-1</sup>) when  $g_s$  values were intermediate (0.2-0.4 mol m<sup>-2</sup> s<sup>-1</sup>), and lowest at high  $g_s$  values (Fig. 8e).

We found a significant negative correlation between SLA and  $g_m$  ( $P=0.001$ ) (Fig. 8g) based on the collected data from studies that measured SLA ( $n=12$ ). Leaf nitrogen content reported by three studies showed a significant correlation between  $g_m$  and N content per area ( $N_{area}$ ) (Fig. 8f).  $g_m$  increased with  $N_{area}$  until a saturation point (~ 0.25 mol m<sup>-2</sup> s<sup>-1</sup>).

## Discussion

### Canopy level

The scaling up of photosynthesis from leaves to the canopy and stands (using the model of Farquhar et al., 1980) requires a deep understanding of within-canopy variations in leaf morpho-physiology and the main drivers of foliage acclimation to the dynamic gradient of environmental conditions (light, temperature, vapor pressure deficit (VPD) and soil moisture) (Niinemets et al., 2006; Buckley and Warren, 2014; Niinemets et al., 2015). Unfortunately, pieces of knowledge regarding the variation of  $g_m$  within the canopy and its mechanistic basis are scarce, in particular for *Populus* spp. This situation

may explain why most global carbon cycle models remain “ $g_m$ -lacking”, with possible consequences, such as overestimating the fertilization effect of  $CO_2$  on global gross primary production and underestimation of water-use efficiency (WUE) and canopy gross photosynthesis under future climate (Sun et al., 2014b; Knauer et al., 2019).

The steep and parallel increase of  $g_m$ ,  $A_{max}$  and  $V_{cmax}$  from the bottom to the top of the canopy found here for *Populus* spp. is in agreement with the findings of Niinemets et al. (2006) for *Quercus ilex* L., Montpied et al. (2009) for *Fagus sylvatica* L., and Warren et al. (2003) for *Pseudotsuga menziesii* (Mirbel) Franco. A decrease of  $g_m$  from the bottom to the top of the canopy was also reported (Bögelein et al., 2012; Cano et al., 2013). In absence of water deficit,  $g_m$  limitation is greater under high light (top of the canopy), compared to shade conditions (Niinemets et al., 2009; Cano et al., 2013).

We observed a significant inverse relationship between  $g_m$  and specific leaf area (SLA), comparable to previous studies (Montpied et al., 2009; Niinemets et al., 2006; Tosens et al., 2012b). This suggests that the increase in leaf thickness (lower SLA), e.g. in developing leaves and in leaves grown under higher light, may be associated with increased  $g_m$  (Tosens et al., 2012b). Tosens et al. (2012b) for leaves grown under low and high soil moisture, and Muir et al. (2014) for four species of *Solanum* spp. showed a positive relationship between SLA and  $g_m$ . In Tosens et al. (2012b), this relationship reflected increased density of leaves grown under lower water availability. This evidence collectively demonstrates the complex nature of the relationship between SLA and  $g_m$ , reflecting the circumstance that SLA is an inverse of the product of leaf thickness and density that can respond differently to environmental drivers (Niinemets, 1999; Poorter et al., 2009). The profile of  $g_m$  within the canopy observed here may be



partially attributable to the morphological acclimation of *Populus* spp. foliage to light availability within the canopy. Moreover, this inverse-relationship between SLA and  $g_m$  was used as an empirical model to estimate a maximum attainable  $g_m$  at different canopy layers for  $C_3$  plant and was implemented in Community Land Model (CLM.4.5) (Sun et al., 2014b; Knauer et al., 2019).

The change in morphological traits and their role in the acclimation of  $g_m$  to a vertical gradient of environmental conditions within the canopy need additional investigations. For instance, shade acclimation of leaf morphology is associated with a lower surface area of chloroplasts exposed to intercellular air spaces ( $S_c/S$ ) and thicker chloroplasts (Hanba et al., 2002; Niinemets et al., 2006; Tosens et al., 2012b; Peguero-Pina et al., 2015). Species-specific leaf development patterns (i.e., evergreen sclerophyllous vs. deciduous broadleaves) affect limitations to gas diffusion, thus determining the carbon balance of leaves (Marchi et al., 2007). However, light acclimation may be species-specific and altered by water and soil nitrogen, and leaf ontogeny (Niinemets et al., 2006; Tazoe et al., 2009; Peguero-Pina et al., 2015; Shrestha et al., 2018). It is still unclear whether  $g_m$  profile within the canopy is the result of the change in SLA.

Our results showing higher  $g_s$  and  $g_m/g_s$  at the top of the canopy are in disagreement with the findings of Montpied et al. (2009) and Bögelein et al. (2012), suggesting a species- and environment-specific gradient of  $g_m/g_s$ . Temperature and VPD responses of  $g_m$  and  $g_s$  are different (Cano et al., 2013), resulting in different diurnal patterns of  $g_m$  and  $g_s$ . Then, the gradient of  $g_m/g_s$  ratio along the canopy may drive the WUE at the canopy level and the midday depression of photosynthetic rate regardless of the level of isohydry of clones (Cano et al., 2013; Buckley and Warren, 2014; Stangl et al., 2019).

## Ambient CO<sub>2</sub>

The response of photosynthetic capacity and diffusion of CO<sub>2</sub> to free air CO<sub>2</sub> enrichment (FACE) considerably differed between species and experimental setups. The decrease in  $A_{\max}$  and  $g_s$  in response to elevated CO<sub>2</sub> showed in our meta-analysis is in agreement with numerous studies on *Populus* spp. and other species (Ainsworth and Rogers, 2007; Medlyn et al., 2013; DaMatta et al., 2016), but is in disagreement with the findings of some other studies, e.g., Sigurdsson et al. (2001) and Uddling et al. (2009). For  $g_m$ , the effect of growth CO<sub>2</sub> changed among studies and some species having an intrinsic low  $g_m$  are more likely to respond to elevated CO<sub>2</sub> than species with high intrinsic  $g_m$  (Niinemets et al., 2011). However, several studies have reported that  $g_m$  may decrease or be unresponsive to CO<sub>2</sub> enrichment (Singsaas et al., 2004; Zhu et al., 2012; Kitao et al., 2015; Mizokami et al., 2019). This suggests that the increase of  $A_{\max}$  under elevated CO<sub>2</sub> cannot be attributed solely to  $g_m$  variation (Singsaas et al., 2004). The absence of  $g_m$  response to elevated CO<sub>2</sub> complicates the research on mechanisms underlying this variation. Unlike  $g_m$ , researchers proposed some hypotheses like least-cost theory, nitrogen limitation and resources investment to explain the decrease of  $A_{\max}$ ,  $V_{c\max}$  and  $g_s$  under elevated CO<sub>2</sub> (Leakey et al., 2009; Smith and Keenan, 2020).

## Copper stress

Similar to our findings,  $g_m$  remained unchanged in the herbaceous plant *Silene paradoxa* L., exposed to high Cu concentration, although  $g_s$  decreased significantly (Bazihizina et al., 2015). In other cases of exposure to other heavy metals, like nickel (Ni), Velikova et al. (2011) reported a significant decrease in chloroplast CO<sub>2</sub> content and mesophyll conductance in black poplar (*P. nigra* L.) exposed to 200 µM Ni under a

hydroponic setup (compared to control = 30  $\mu$ M Ni). This reduction of  $g_m$  might be attributed to an alteration of leaf structure by toxic effect of high concentrations of heavy metals in mesophyll cells Velikova et al. (2011). Hermle et al. (2007), reported an acceleration of senescence and necrosis of mesophyll cells in *P. tremula* L. leaves exposed to Cu, Zn, Cd and Pb at 640, 3000, 10 and 90 mg per kg of soil, respectively, and a decrease of chloroplast size from the early stages of exposure. The study of Hermle et al. (2007) also reported the thickening of cell walls and change of their chemical composition in damaged mesophyll cells, which might have affected permeability of cell walls and diffusion of CO<sub>2</sub> through them. Mercury (Hg) (HgCl<sub>2</sub> form) altered CO<sub>2</sub> diffusion through aquaporins, a membrane channel of CO<sub>2</sub> diffusion, in faba bean (*Vicia faba* L.) (Terashima and Ono, 2002) and significantly reduced  $g_m$  in *P. trichocarpa* Torr. & Gray. HgCl<sub>2</sub> may also decrease  $g_m$  indirectly by disrupting carbonic anhydrase activity, as reported by Momayyezi and Guy (2018), and demonstrated that carbonic anhydrase activity is strongly associated with  $g_m$  variation in *P. trichocarpa* Torr. & Gray (Momayyezi and Guy, 2017).

## Soil Nitrogen

The increase of  $A_{max}$  by the enhancement of  $V_{cmax}$  in response to more available soil nitrogen has been established in the literature. However, the possible contribution of  $g_m$  to this augmentation remains unexplored for several species. Our results showed a concomitant increase of  $g_m$  with a higher supply of N. A positive correlation between the level of expression of AQPs genes (PIPs and TIPs) and  $g_m$  has been reported (Hanba et al., 2004; Flexas et al., 2006; Kaldenhoff et al., 2008; Perez-Martin et al. 2014), although it is still unclear whether this is a direct effect or a pleiotropic effect reflecting

simultaneous increase in  $A_{\max}$ ,  $g_m$  and  $g_s$  (Flexas et al., 2012). Recent studies have demonstrated that an increase in  $g_m$  has coincided with an increase in the amount of AQPs after fertilization (Miyazawa et al., 2008b; Zhu et al., 2020).

## Soil moisture

Although many studies showed a decline of  $g_m$  in response to soil water deficit (Flexas et al., 2009; Galle et al., 2009; Tosens et al., 2012a), it remains unclear if this limitation is happening within the mesophyll environment or occurs as a result of a stomatal limitation, which decreases intercellular  $CO_2$  ( $C_i$ ). Th  roux-Rancourt et al. (2015) showed that, in hybrid poplar,  $g_m$  remained unchanged ( $\sim 0.3 \text{ mol m}^{-2} \text{ s}^{-1}$ ) following soil drying ( $\Psi_{\text{leaf}} \sim -0.4$  to  $-1.2$  MPa), while  $g_s$  decreased, until a threshold of  $g_s \sim 0.15 \text{ mol m}^{-2} \text{ s}^{-1}$  from, which  $g_m$  decreased significantly as well. In a trial on *Quercus robur* L. and *Fraxinus angustifolia* Vahl grown in field, Grassi and Magnani (2005) reported a concomitant decrease of both  $g_s$  and  $g_m$  in a dry year ( $\Psi_{\text{soil}} \sim -1.7$  MPa), compared with a wetter year ( $\Psi_{\text{soil}} \sim -0.2$  MPa). In *P. tremula* L.,  $g_m$  significantly declined when  $\Psi_{\text{leaf}}$  of saplings dropped from  $-0.3$  to  $-0.7$  MPa due to applied osmotic stress (Tosens et al., 2012a). Simultaneously, drought stress induced decrease in SLA accompanied with an increase in the cell wall thickness and a decrease in the chloroplast surface area exposed to intercellular air space per unit leaf area (Tosens et al., 2012a). Other studies have shown that biochemical changes induced by drought stress, like deactivation of aquaporins, could decrease  $CO_2$  diffusion to carboxylation sites in the chloroplast (Miyazawa et al., 2008a).

Adaptation to the local environment might be a key driver of  $g_m$  variation among taxa, similarly to other morpho-physiological traits. Interspecific and intraspecific differences

in  $g_m$  from mesic *versus* xeric environments (*Quercus* spp. and *Eucalyptus* spp.) were reported by Zhou et al. (2014). Their study showed that  $g_m$ , as well as  $g_s$ ,  $V_{cmax}$  and  $J$  of species from drier regions were less sensitive to water deficit which maintains transpiration and photosynthesis activity at higher rates under drought, compared to species from the mesic environment. Marchi et al. (2008) observed that structural protection of mesophyll cells had a priority over functional efficiency of photochemical mechanisms in *Olea europaea* L. (evergreen sclerophyllous) but not in *Prunus persica* L. (deciduous broadleaf), depending on age-related variation in mesophyll anatomy.

## Conclusion and Future Directions

The present review shows that  $g_m$  in *Populus* spp. varies predictably along light gradients and that it responds to changes in soil moisture and nutrient availability, but is not affected by metal concentration and increasing atmospheric CO<sub>2</sub> concentration. Although metabolic processes noticeably influence the response of  $g_m$  to environmental changes, physical constraints through leaf development and ageing need to be considered in scaling photosynthesis from leaf to canopy, and in breeding programs for high WUE. Because fast-growing *Populus* spp. trees are important players in combating climate change, mitigating carbon emissions to some extent, comparisons of genotypes with different adaptations to changing environments and breeding for novel genotype-climate associations are urgently needed. This study shows that the variability of  $g_m$  in different experimental conditions offers a potential indicator for improving *Populus* spp. productivity and resilience. However, more research is yet needed, also combined with anatomical studies, to better understand the sources of variation of CO<sub>2</sub> diffusion through the mesophyll and their consequences on carbon assimilation and growth.

Moreover, determination of the efficiency and optimal age for early selection of fast-growing poplar clones require an understanding of the genetic control and age-based genetic correlations for traits related to  $g_m$  and growth. For that, a detailed evaluation of the genotypic control of the variances and clonal heritability of  $g_m$  is needed. Finally, the identification of molecular bases of the regulation of  $g_m$  is necessary to further refine a multi-criteria early selection approach of poplar clones dedicated to the future forestry capable of ensuring better productivity and increased resistance to environmental stresses (frost, drought, water logging, heavy metals, heat waves, etc.).

## Acknowledgements

This research was supported by the University of Québec in Abitibi-Témiscamingue (UQAT) as startup funds to ML. The authors acknowledge researchers who kindly provided data used in the meta-analysis.

## Conflict of interests

The authors declare that there is no conflict of interest.

## Data Availability

The datasets generated for this study are available on request to the corresponding author.

## 476 References

- Ainsworth, E. A., and Rogers, A. 2007. The response of photosynthesis and stomatal conductance to rising [CO<sub>2</sub>]: mechanisms and environmental interactions. *Plant, Cell & Environment*, 30(3):258-270.
- Attia, Z., Domec, J.-C., Oren, R., Way, D. A. and Moshelion, M. 2015. Growth and physiological responses of isohydric and anisohydric poplars to drought. *Journal of Experimental Botany* 66(14):4373-4381.
- Barbour, M. M., Warren, C. R., Farquhar, G. D., Forrester, G. and Brown, H. 2010. Variability in mesophyll conductance between barley genotypes, and effects on transpiration efficiency and carbon isotope discrimination. *Plant, Cell & Environment* 33(7):1176-1185.
- Barbour, M.M., Evans, J.R., Simonin, K.A., von Caemmerer, S. 2016. Online CO<sub>2</sub> and H<sub>2</sub>O oxygen isotope fractionation allows estimation of mesophyll conductance in C<sub>4</sub> plants, and reveals that mesophyll conductance decreases as leaves age in both C<sub>4</sub> and C<sub>3</sub> plants. *New Phytologist* (210):875-889.
- Bazihizina, N., Colzi, I., Giorni, E., Mancuso, S., and Gonnelli, C. 2015. Photosynthesizing on metal excess: Copper differently induced changes in various photosynthetic parameters in copper tolerant and sensitive *Silene paradoxa* L. populations. *Plant Science*, 232:67-76.
- Benomar, L., Lamhamedi, M. S., Pepin, S., Rainville, A., Lambert, M.-C., Margolis, H. A., Bousquet, J. and Beaulieu, J. 2018. Thermal acclimation of photosynthesis and respiration of southern and northern white spruce seed sources tested along a regional climatic gradient indicates limited potential to cope with temperature warming. *Annals of Botany* 121(3):443-457.
- Benomar, L., Moutaoufik, M. T., Elferjani, R., Isabel, N., DesRochers, A., El Guellab, A., Khelifa, R. and Idrissi Hassania, L. A. 2019. Thermal acclimation of photosynthetic activity and RuBisCO content in two hybrid poplar clones. *PLOS ONE* 14(2):e0206021.
- Bögelein, R., Hassdenteufel, M., Thomas, F. M. and Werner, W. 2012. Comparison of leaf gas exchange and stable isotope signature of water-soluble compounds along canopy gradients of co-occurring Douglas-fir and European beech. *Plant, Cell & Environment* 35(7):1245-1257.
- Borghi, M., Tognetti, R., Monteforti, G. and Sebastiani, L. 2007. Responses of *Populus × euramericana* (*P. deltoides* × *P. nigra*) clone Adda to increasing copper concentrations. *Environmental and Experimental Botany* 61(1):66-73.
- Borghi, M., Tognetti, R., Monteforti, G. and Sebastiani, L. 2008. Responses of two poplar species (*Populus alba* and *Populus × canadensis*) to high copper concentrations. *Environmental and Experimental Botany* 62(3):290-299.
- Bown, H. E., Watt, M. S., Mason, E. G., Clinton, P. W. and Whitehead, D. 2009. The influence of nitrogen and phosphorus supply and genotype on mesophyll conductance limitations to photosynthesis in *Pinus radiata*. *Tree Physiology* 29(9):1143-1151.
- Buckley, T. N. and Warren, C. R. 2014. The role of mesophyll conductance in the economics of nitrogen and water use in photosynthesis. *Photosynthesis Research* 119(1):77-88.
- Calfapietra, C., Tulva, I., Eensalu, E., Perez, M., De Angelis, P., Scarascia-Mugnozza, G. and Kull, O. 2005. Canopy profiles of photosynthetic parameters under elevated CO<sub>2</sub> and N fertilization in a poplar plantation. *Environmental Pollution* 137(3):525-535.
- Cano, F. J., Sánchez-Gómez, D., Rodríguez-Calcerrada, J., Warren, C. R., Gil, L. and Aranda, I. 2013. Effects of drought on mesophyll conductance and photosynthetic limitations at different tree canopy layers. *Plant, Cell & Environment* 36(11):1961-1980.



- Castagna, A., Di Baccio, D., Ranieri, A. M., Sebastiani, L. and Tognetti, R. 2015. Effects of combined ozone and cadmium stresses on leaf traits in two poplar clones. *Environmental Science and Pollution Research* 22(3):2064-2075.
- DaMatta, F. M., Godoy, A. G., Menezes-Silva, P. E., Martins, S. C., Sanglard, L. M., Morais, L. E., ... and Ghini, R. 2016. Sustained enhancement of photosynthesis in coffee trees grown under free-air CO<sub>2</sub> enrichment conditions: disentangling the contributions of stomatal, mesophyll, and biochemical limitations. *Journal of Experimental Botany*, 67(1):341-352.
- Di Baccio, D., Tognetti, R., Minnocci, A. and Sebastiani, L. 2009. Responses of the *Populus x euramericana* clone I-214 to excess zinc: Carbon assimilation, structural modifications, metal distribution and cellular localization. *Environmental and Experimental Botany* 67(1):153-163.
- Dillaway, D. N. and Kruger, E. L. 2010. Thermal acclimation of photosynthesis: a comparison of boreal and temperate tree species along a latitudinal transect. *Plant, Cell & Environment* 33(6):888-899.
- Dubois, J.-J. B., Fiscus, E. L., Booker, F. L., Flowers, M. D. and Reid, C. D. 2007. Optimizing the statistical estimation of the parameters of the Farquhar–von Caemmerer–Berry model of photosynthesis. *New Phytologist* 176(2):402-414.
- Elferjani, R., DesRochers, A. and Tremblay, F. 2016. Plasticity of bud phenology and photosynthetic capacity in hybrid poplar plantations along a latitudinal gradient in northeastern Canada. *Environmental and Experimental Botany* 125:67-76.
- Ethier, G. J. and Livingston, N. J. 2004. On the need to incorporate sensitivity to CO<sub>2</sub> transfer conductance into the Farquhar–von Caemmerer–Berry leaf photosynthesis model. *Plant, Cell & Environment* 27(2):137-153.
- Evans, J. R., Kaldenhoff, R., Genty, B. and Terashima, I. 2009. Resistances along the CO<sub>2</sub> diffusion pathway inside leaves. *Journal of Experimental Botany* 60(8):2235-2248.
- Farquhar, G. D., von Caemmerer, S. and Berry, J. A. 1980. A biochemical model of photosynthetic CO<sub>2</sub> assimilation in leaves of C<sub>3</sub> species. *Planta* 149(1):78-90.
- Flexas, J., Ribas-Carbó, M., Hanson, D. T., Bota, J., Otto, B., Cifre, J., McDowell, N., Medrano, H. and Kaldenhoff, R. 2006. Tobacco aquaporin NtAQP1 is involved in mesophyll conductance to CO<sub>2</sub> in vivo. *The Plant Journal* 48(3):427-439.
- Flexas, J., Ribas-Carbó, M., Diaz-Espejo, A., Galmés, J. and Medrano, H. 2008. Mesophyll conductance to CO<sub>2</sub>: current knowledge and future prospects. *Plant, Cell & Environment* 31(5):602-621.
- Flexas, J., Barón, M., Bota, J., Ducruet, J.-M., Gallé, A., Galmés, J., Jiménez, M., Pou, A., Ribas-Carbó, M., Sajnani, C. and others. 2009. Photosynthesis limitations during water stress acclimation and recovery in the drought-adapted *Vitis* hybrid Richter-110 (*V. berlandier* × *V. rupestris*). *Journal of Experimental Botany* 60(8):2361-2377.
- Flexas, J., Barbour, M. M., Brendel, O., Cabrera, H. M., Carriquí, M., Díaz-Espejo, A., Douthe, C., Dreyer, E., Ferrio, J. P., Gago, J. and others. 2012. Mesophyll diffusion conductance to CO<sub>2</sub>: An unappreciated central player in photosynthesis. *Plant Science* 193-194:70-84.
- Flexas, J., Scoffoni, C., Gago, J. and Sack, L. 2013. Leaf mesophyll conductance and leaf hydraulic conductance: an introduction to their measurement and coordination. *Journal of Experimental Botany* 64(13):3965-3981.
- Flexas, J., Díaz-Espejo, A., Conesa, M. A., Coopman, R. E., Douthe, C., Gago, J., Gallé, A., Galmés, J., Medrano, H., Ribas-Carbo, M. and others. 2016. Mesophyll conductance to CO<sub>2</sub> and Rubisco as targets for improving intrinsic water use efficiency in C<sub>3</sub> plants. *Plant, Cell & Environment* 39(5):965-982.
- Galle, A., Florez-Sarasa, I., Tomas, M., Pou, A., Medrano, H., Ribas-Carbo, M. and Flexas, J. 2009. The role of mesophyll conductance during water stress and recovery in tobacco



- (*Nicotiana sylvestris*): acclimation or limitation? *Journal of Experimental Botany* 60(8):2379-2390.
- Grassi, G. and Magnani, F. 2005. Stomatal, mesophyll conductance and biochemical limitations to photosynthesis as affected by drought and leaf ontogeny in ash and oak trees. *Plant, Cell & Environment* 28(7):834-849.
- Gu, L., Pallardy, S. G., Tu, K., Law, B. E. and Wullschlegel, S. D. 2010. Reliable estimation of biochemical parameters from  $C_3$  leaf photosynthesis–intercellular carbon dioxide response curves. *Plant, Cell & Environment* 33(11):1852-1874.
- Hanba, Y. T., Kogami, H. and Terashima, I. 2002. The effect of growth irradiance on leaf anatomy and photosynthesis in *Acer* species differing in light demand. *Plant, Cell & Environment* 25(8):1021-1030.
- Hanba, Y. T., Shibasaka, M., Hayashi, Y., Hayakawa, T., Kasamo, K., Terashima, I. and Katsuhara, M. 2004. Overexpression of the Barley Aquaporin HvPIP2;1 Increases Internal  $CO_2$  Conductance and  $CO_2$  Assimilation in the Leaves of Transgenic Rice Plants. *Plant and Cell Physiology* 45(5):521-529.
- Harley, P. C., Thomas, R. B., Reynolds, J. F. and Strain, B. R. 1992. Modelling photosynthesis of cotton grown in elevated  $CO_2$ . *Plant, Cell & Environment* 15(3):271-282.
- Hermle, S., Vollenweider, P., Günthardt-Goerg, M. S., McQuattie, C. J. and Matyssek, R. 2007. Leaf responsiveness of *Populus tremula* and *Salix viminalis* to soil contaminated with heavy metals and acidic rainwater. *Tree Physiology* 27(11):1517-1531.
- Kaldenhoff, R., Ribas-Carbo, M., Sans, J. F., Lovisolo, C., Heckwolf, M. and Uehlein, N. 2008. Aquaporins and plant water balance. *Plant, Cell & Environment* 31(5):658-666.
- Kattge, J., and Knorr, W. 2007. Temperature acclimation in a biochemical model of photosynthesis: a reanalysis of data from 36 species. *Plant, Cell & Environment*, 30(9):1176-1190.
- Kitao, M., Yazaki, K., Kitaoka, S., Fukatsu, E., Tobita, H., Komatsu, M., Maruyama, Y. and Koike, T. 2015. Mesophyll conductance in leaves of Japanese white birch (*Betula platyphylla* var. *japonica*) seedlings grown under elevated  $CO_2$  concentration and low N availability. *Physiologia Plantarum* 155(4):435-445.
- Knauer, J., Zaehle, S., De Kauwe, M. G., Bahar, N. H. A., Evans, J. R., Medlyn, B. E., Reichstein, M. and Werner, C. 2019. Effects of mesophyll conductance on vegetation responses to elevated  $CO_2$  concentrations in a land surface model. *Global Change Biology* 25(5):1820-1838.
- Larocque, G. R., A., D., M., L., F., T., J., B., A., M., J.E., M., S., G., B.R., T., D., S. and others. 2013. Research on hybrid poplars and willow species for fast-growing tree plantations: Its importance for growth and yield, silviculture, policy-making and commercial applications. *The Forestry Chronicle* 89(01):32-41.
- Leakey, A. D. B., Ainsworth, E. A., Bernacchi, C. J., Rogers, A., Long, S. P. and Ort, D. R. 2009. Elevated  $CO_2$  effects on plant carbon, nitrogen, and water relations: six important lessons from FACE. *Journal of Experimental Botany* 60(10):2859-2876.
- Li, J., Yu, B., Zhao, C., Nowak, R. S., Zhao, Z., Sheng, Y. and Li, J. 2012. Physiological and morphological responses of *Tamarix ramosissima* and *Populus euphratica* to altered groundwater availability. *Tree Physiology* 33(1):57-68.
- Manter, D. K. and Kerrigan, J. 2004. A- $C_i$  curve analysis across a range of woody plant species: influence of regression analysis parameters and mesophyll conductance. *Journal of Experimental Botany* 55(408):2581-2588.
- Marchi, S., Guidotti, D., Sebastiani, L. and Tognetti, R. 2007. Changes in assimilation capacity during leaf development in broad-leaved *Prunus persica* and sclerophyllous *Olea europaea*. *Journal of Horticultural Science & Biotechnology* 82:69-78.
- Marchi, S., Tognetti, R., Minnocci, A., Borghi, M., Sebastiani, L. 2008. Variation in mesophyll anatomy and photosynthetic capacity during leaf development in a deciduous

- mesophyte fruit tree (*Prunus persica*) and an evergreen sclerophyllous Mediterranean shrub (*Olea europaea*). *Trees* 22:559-571.
- Medlyn, B. E., Duursma, R. A., De Kauwe, M. G. and Prentice, I. C. 2013. The optimal stomatal response to atmospheric CO<sub>2</sub> concentration: Alternative solutions, alternative interpretations. *Agricultural and Forest Meteorology*, 182: 200-203.
- Mengersen, K., J. Gurevitch, and C. H. Schmid. 2013. Chap. 18: Meta-analysis of Primary Data. In: Koricheva, J., J. Gurevitch, and K. Mengersen (eds), *Handbook of Meta-analysis in Ecology and Evolution*, pp. 300-312. Princeton University Press, Oxford, UK, 592 p.
- Merilo, E., Kaurilind, E., Tulva, I., Räm, O., Calfapietra, C. and Kull, O. 2010. Photosynthetic response to elevated CO<sub>2</sub> in poplar (POP-EUROFACE) in relation to leaf nitrogen partitioning. *Baltic Forestry* 16:162-171.
- Miao, Z., Xu, M., Lathrop, R. and Wang, Y. 2009. Comparison of the A–C<sub>c</sub> curve fitting methods in determining maximum ribulose 1,5-bisphosphate carboxylase/oxygenase carboxylation rate, potential light saturated electron transport rate and leaf dark respiration. *Plant, Cell & Environment* 32:109-22.
- Miyazawa, S.-I., Yoshimura, S., Shinzaki, Y., Maeshima, M. and Miyake, C. 2008a. Deactivation of aquaporins decreases internal conductance to CO<sub>2</sub> diffusion in tobacco leaves grown under long-term drought. *Functional Plant Biology* 35(7):553-564.
- Miyazawa, S.-I., Yoshimura, S., Shinzaki, Y., Maeshima, M. and Miyake, C. 2008b. Relationship Between Mesophyll Conductance to CO<sub>2</sub> Diffusion and Contents of Aquaporin Localized at Plasma Membrane in Tobacco Plants Grown Under Drought Conditions. Dordrecht.
- Mizokami, Y., Sugiura, D., Watanabe, C. K. A., Betsuyaku, E., Inada, N. and Terashima, I. 2019. Elevated CO<sub>2</sub>-induced changes in mesophyll conductance and anatomical traits in wild type and carbohydrate-metabolism mutants of *Arabidopsis*. *Journal of Experimental Botany* 70(18):4807-4818.
- Momayyezi, M. and Guy, R. D. 2017. Substantial role for carbonic anhydrase in latitudinal variation in mesophyll conductance of *Populus trichocarpa* Torr. & Gray. *Plant, Cell & Environment* 40(1):138-149.
- Momayyezi, M. and Guy, R. D. 2018. Concomitant effects of mercuric chloride on mesophyll conductance and carbonic anhydrase activity in *Populus trichocarpa* Torr. & Gray. *Trees* 32(1):301-309.
- Montpied, P., Granier, A. and Dreyer, E. 2009. Seasonal time-course of gradients of photosynthetic capacity and mesophyll conductance to CO<sub>2</sub> across a beech (*Fagus sylvatica* L.) canopy. *Journal of Experimental Botany* 60(8):2407-2418.
- Moualeu-Ngangue, D. P., Chen, T. W., and Stützel, H. 2017. A new method to estimate photosynthetic parameters through net assimilation rate– intercellular space CO<sub>2</sub> concentration (A–C<sub>i</sub>) curve and chlorophyll fluorescence measurements. *New Phytologist*, 213(3):1543-1554.
- Muir, C. D., Hangarter, R. P., Moyle, L. C., and Davis, P. A. 2014. Morphological and anatomical determinants of mesophyll conductance in wild relatives of tomato (*Solanum* sect. *Lycopersicon*, sect. *Lycopersicoides*; Solanaceae). *Plant, Cell & Environment*, 37(6):1415-1426.
- Niinemets, Ü., Kull, O. and Tenhunen, J. D. 1998. An analysis of light effects on foliar morphology, physiology, and light interception in temperate deciduous woody species of contrasting shade tolerance. *Tree Physiology* 18(10):681-696.
- Niinemets, Ü. 1999. Research review. Components of leaf dry mass per area - thickness and density - alter leaf photosynthetic capacity in reverse directions in woody plants. *The New Phytologist*. 144:35-47.
- Niinemets, Ü., A. Cescatti, M. Rodeghiero and T. Tosens 2005. Leaf internal diffusion conductance limits photosynthesis more strongly in older leaves of Mediterranean evergreen broad-leaved species. *Plant, Cell and Environment*. 28:1552-1566.

- Niinemets, Ü., Cescatti, A., Rodeghiero, M. and Tosens, T. 2006. Complex adjustments of photosynthetic potentials and internal diffusion conductance to current and previous light availabilities and leaf age in Mediterranean evergreen species *Quercus ilex*. *Plant, Cell & Environment* 29(6):1159-1178.
- Niinemets, Ü., Díaz-Espejo, A., Flexas, J., Galmés, J. and Warren, C. R. 2009. Role of mesophyll diffusion conductance in constraining potential photosynthetic productivity in the field. *Journal of Experimental Botany* 60(8):2249-2270.
- Niinemets, Ü., Flexas, J., and Peñuelas, J. 2011. Evergreens favored by higher responsiveness to increased CO<sub>2</sub>. *Trends in Ecology & Evolution*, 26(3):136-142.
- Niinemets, Ü., Keenan, T. F. and Hallik, L. 2015. A worldwide analysis of within-canopy variations in leaf structural, chemical and physiological traits across plant functional types. *New Phytologist* 205(3):973-993.
- Qiu, C., Ethier, G., Pepin, S., Dubé, P., Desjardins, Y. and Gosselin, A. 2017. Persistent negative temperature response of mesophyll conductance in red raspberry (*Rubus idaeus* L.) leaves under both high and low vapour pressure deficits: a role for abscisic acid? *Plant, Cell & Environment* 40(9):1940-1959.
- Peguero-Pina, J. J., Sancho-Knapik, D., Flexas, J., Galmés, J., Niinemets, Ü. and Gil-Pelegrín, E. 2015. Light acclimation of photosynthesis in two closely related firs (*Abies pinsapo* Boiss. and *Abies alba* Mill.): the role of leaf anatomy and mesophyll conductance to CO<sub>2</sub>. *Tree Physiology* 36(3):300-310.
- Perez-Martin, A., Michelazzo, C., Torres-Ruiz, J. M., Flexas, J., Fernández, J. E., Sebastiani, L. and Diaz-Espejo, A. 2014. Regulation of photosynthesis and stomatal and mesophyll conductance under water stress and recovery in olive trees: correlation with gene expression of carbonic anhydrase and aquaporins. *Journal of Experimental Botany* 65(12):3143-3156.
- Poorter, H., Ü. Niinemets, L. Poorter, I.J. Wright and R. Villar 2009. Tansley review. Causes and consequences of variation in leaf mass per area (LMA): a meta-analysis. *The New Phytologist*. 182:565-588.
- Ripullone, F., Grassi, G., Lauteri, M. and Borghetti, M. 2003. Photosynthesis–nitrogen relationships: interpretation of different patterns between *Pseudotsuga menziesii* and *Populus x euroamericana* in a mini-stand experiment. *Tree Physiology* 23(2):137-144.
- Pons, T. L., Flexas, J., von Caemmerer, S., Evans, J. R., Genty, B., Ribas-Carbo, M. and Brugnoli, E. 2009. Estimating mesophyll conductance to CO<sub>2</sub>: methodology, potential errors, and recommendations. *Journal of Experimental Botany* 60(8):2217-2234.
- Riley, R. D, P. C. Lambert, and G. Abo-Zaid. 2010. Meta-analysis of individual participant data: rationale, conduct, and reporting. *British Medical Journal*, 340: c221. DOI: 10.1136/bmj.c221
- Ryan, A., Cojocariu, C., Possell, M., Davies, W. J. and Hewitt, C. N. 2009. Defining hybrid poplar (*Populus deltoides* x *Populus trichocarpa*) tolerance to ozone: identifying key parameters. *Plant, Cell & Environment* 32(1):31-45.
- Sharkey, T. D., Bernacchi, C. J., Farquhar, G. D. and Singsaas, E. L. 2007. Fitting photosynthetic carbon dioxide response curves for C<sub>3</sub> leaves. *Plant, Cell & Environment* 30(9):1035-1040.
- Shrestha, A., Buckley, T. N., Lockhart, E. L. and Barbour, M. M. 2018. The response of mesophyll conductance to short- and long-term environmental conditions in chickpea genotypes. *AoB PLANTS* 11(1).
- Sigurdsson, B. D., Thorgeirsson, H., and Linder, S. 2001. Growth and dry-matter partitioning of young *Populus trichocarpa* in response to carbon dioxide concentration and mineral nutrient availability. *Tree Physiology*, 21(12-13):941-950.

- Silim, S. N., Ryan, N. and Kubien, D. S. 2010. Temperature responses of photosynthesis and respiration in *Populus balsamifera* L.: acclimation versus adaptation. *Photosynthesis Research* 104(1):19-30.
- Singsaas, E. L., Ort, D. R. and Delucia, E. H. 2004. Elevated CO<sub>2</sub> effects on mesophyll conductance and its consequences for interpreting photosynthetic physiology. *Plant, Cell & Environment* 27(1):41-50.
- Smith, N. G. and Keenan, T. F. 2020. Mechanisms underlying leaf photosynthetic acclimation to warming and elevated CO<sub>2</sub> as inferred from least-cost optimality theory. *Global Change Biology* 26(9):5202-5216.
- Soolanayakanahally, R. Y., Guy, R. D., Silim, S. N., Drewes, E. C. and Schroeder, W. R. 2009. Enhanced assimilation rate and water use efficiency with latitude through increased photosynthetic capacity and internal conductance in balsam poplar (*Populus balsamifera* L.). *Plant, Cell & Environment* 32(12):1821-1832.
- Stangl, Z. R., Tarvainen, L., Wallin, G., Ubierna, N., Råntfors, M. and Marshall, J. D. 2019. Diurnal variation in mesophyll conductance and its influence on modelled water-use efficiency in a mature boreal *Pinus sylvestris* stand. *Photosynthesis Research* 141(1):53-63.
- Sun, J., Feng, Z., Leakey, A. D. B., Zhu, X., Bernacchi, C. J. and Ort, D. R. 2014a. Inconsistency of mesophyll conductance estimate causes the inconsistency for the estimates of maximum rate of Rubisco carboxylation among the linear, rectangular and non-rectangular hyperbola biochemical models of leaf photosynthesis—A case study of CO<sub>2</sub> enrichment and leaf aging effects in soybean. *Plant Science* 226:49-60.
- Sun, Y., Gu, L., Dickinson, R. E., Norby, R. J., Pallardy, S. G. and Hoffman, F. M. 2014b. Impact of mesophyll diffusion on estimated global land CO<sub>2</sub> fertilization. *Proceedings of the National Academy of Sciences of the United States of America* 111(44):15774-15779.
- Tazoe, Y., von Caemmerer, S., Badger, M. R. and Evans, J. R. 2009. Light and CO<sub>2</sub> do not affect the mesophyll conductance to CO<sub>2</sub> diffusion in wheat leaves. *Journal of Experimental Botany* 60(8):2291-2301.
- Terashima, I. and Ono, K. 2002. Effects of HgCl<sub>2</sub> on CO<sub>2</sub> Dependence of Leaf Photosynthesis: Evidence Indicating Involvement of Aquaporins in CO<sub>2</sub> Diffusion across the Plasma Membrane. *Plant and Cell Physiology* 43(1):70-78.
- Théroux-Rancourt, G., Éthier, G. and Pepin, S. 2014. Threshold response of mesophyll CO<sub>2</sub> conductance to leaf hydraulics in highly transpiring hybrid poplar clones exposed to soil drying. *Journal of Experimental Botany* 65(2):741-753.
- Théroux Rancourt, G., Éthier, G. and Pepin, S. 2015. Greater efficiency of water use in poplar clones having a delayed response of mesophyll conductance to drought. *Tree Physiology* 35(2):172-184.
- Tissue, D. T., Lewis, J. D. and Niinemets, Ü. 2010. Photosynthetic responses of cottonwood seedlings grown in glacial through future atmospheric [CO<sub>2</sub>] vary with phosphorus supply. *Tree Physiology* 30(11):1361-1372.
- Tognetti, R., Sebastiani, L. and Minnocci, A. 2004. Gas exchange and foliage characteristics of two poplar clones grown in soil amended with industrial waste. *Tree Physiology* 24(1):75-82.
- Tomás, M., Flexas, J., Copolovici, L., Galmés, J., Hallik, L., Medrano, H., Ribas-Carbó, M., Tosens, T., Vislap, V. and Niinemets, Ü. 2013. Importance of leaf anatomy in determining mesophyll diffusion conductance to CO<sub>2</sub> across species: quantitative limitations and scaling up by models. *Journal of Experimental Botany* 64(8):2269-2281.
- Tosens, T., Niinemets, Ü., Vislap, V., Eichelmann, H. and Castro Díez, P. 2012a. Developmental changes in mesophyll diffusion conductance and photosynthetic capacity under different light and water availabilities in *Populus tremula*: how structure constrains function. *Plant, Cell & Environment* 35(5):839-856.



- Tosens, T., Niinemets, Ü., Westoby, M., Wright, I.J. 2012b. Anatomical basis of variation in mesophyll resistance in eastern Australian sclerophylls: News of a long and winding path. *Journal of Experimental Botany* 63: 5105–5119.
- Tosens, T. and Laanisto, L. 2018. Mesophyll conductance and accurate photosynthetic carbon gain calculations. *Journal of experimental botany* 69:5315-5318.
- Uddling, J., Teclaw, R. M., Pregitzer, K. S., and Ellsworth, D. S. 2009. Leaf and canopy conductance in aspen and aspen-birch forests under free-air enrichment of carbon dioxide and ozone. *Tree Physiology*, 29(11):1367-1380.
- Velikova, V., Tsonev, T., Loreto, F. and Centritto, M. 2011. Changes in photosynthesis, mesophyll conductance to CO<sub>2</sub>, and isoprenoid emissions in *Populus nigra* plants exposed to excess nickel. *Environmental Pollution* 159(5):1058-1066.
- Warren, C. R. 2004. The photosynthetic limitation posed by internal conductance to CO<sub>2</sub> movement is increased by nutrient supply. *Journal of Experimental Botany* 55(406):2313-2321.
- Warren, C. 2006. Estimating the internal conductance to CO<sub>2</sub> movement. *Functional Plant Biology* 33(5):431-442.
- Warren, C. R. 2008. Does growth temperature affect the temperature responses of photosynthesis and internal conductance to CO<sub>2</sub>? A test with *Eucalyptus regnans*. *Tree Physiology* 28(1):11-19.
- Warren, C. R., Ethier, G. J., Livingston, N. J., Grant, N. J., Turpin, D. H., Harrison, D. L. and Black, T. A. 2003. Transfer conductance in second growth *Douglas-fir* (*Pseudotsuga menziesii* (Mirb.) Franco) canopies. *Plant, Cell & Environment* 26(8):1215-1227.
- Xiong, D., Flexas, J., Yu, T., Peng, S. and Huang, J. 2017. Leaf anatomy mediates coordination of leaf hydraulic conductance and mesophyll conductance to CO<sub>2</sub> in *Oryza*. *New Phytologist* 213(2):572-583.
- Xu, Y., Shang, B., Feng, Z. and Tarvainen, L. 2020. Effect of elevated ozone, nitrogen availability and mesophyll conductance on the temperature responses of leaf photosynthetic parameters in poplar. *Tree Physiology* 40(4):484-497.
- Zhou, S., Medlyn, B., Sabaté, S., Sperlich, D., Prentice, I. C. and Whitehead, D. 2014. Short-term water stress impacts on stomatal, mesophyll and biochemical limitations to photosynthesis differ consistently among tree species from contrasting climates. *Tree Physiology* 34(10):1035-1046.
- Zhu, C., Ziska, L., Zhu, J., Zeng, Q., Xie, Z., Tang, H., Jia, X. and Hasegawa, T. 2012. The temporal and species dynamics of photosynthetic acclimation in flag leaves of rice (*Oryza sativa*) and wheat (*Triticum aestivum*) under elevated carbon dioxide. *Physiologia Plantarum* 145(3):395-405.
- Zhu, K., Wang, A., Wu, J., Yuan, F., Guan, D., Jin, C., Zhang, Y. and Gong, C. 2020. Effects of nitrogen additions on mesophyll and stomatal conductance in Manchurian ash and Mongolian oak. *Scientific Reports* 10(1):10038.

477 **Table 1.** List of dataset sources used in the meta-analysis

| Author                  | Journal                                      | <i>Populus</i> species or hybrid parents                                                                                                                                                                                                                 | Number of genotypes | Treatment                                                | Provenance of plant material | Growth Environment                 | Number of curves |
|-------------------------|----------------------------------------------|----------------------------------------------------------------------------------------------------------------------------------------------------------------------------------------------------------------------------------------------------------|---------------------|----------------------------------------------------------|------------------------------|------------------------------------|------------------|
| Attia et al. 2015       | Journal of Experimental Botany               | - <i>P. balsamifera</i> L.<br>- <i>P. simonii</i> Carrière<br>- <i>P. balsamifera</i> L. x <i>P. simonii</i> Carrière                                                                                                                                    | 3                   | Water stress                                             | Canada                       | Growth chamber                     | 15               |
| Benomar et al.          | Unpublished data                             | <i>P. maximowiczii</i> A.Henry x <i>P. balsamifera</i> L.                                                                                                                                                                                                | 2                   | Water stress                                             | Canada                       | Growth chamber                     | 12               |
| Benomar 2012            | PhD thesis                                   | - <i>P. maximowiczii</i> A.Henry x <i>P. balsamifera</i> L.<br>- <i>P. balsamifera</i> L. x <i>P. trichocarpa</i> Torr. & A.Gray                                                                                                                         | 2                   | Spacing & canopy level                                   | Canada                       | Plantation                         | 52               |
| Benomar et al. 2019     | Plos one                                     | - <i>P. maximowiczii</i> A.Henry x <i>P. balsamifera</i> L.<br>- <i>P. maximowiczii</i> A.Henry x <i>P. nigra</i> L.                                                                                                                                     | 2                   | Temperature & nitrogen                                   | Canada                       | Growth chamber                     | 23               |
| Borghi et al. 2007      | Environmental and Experimental Botany        | <i>P. x euramericana</i> ( <i>P. deltoides</i> W.Bartram x <i>P. nigra</i> L.) (clone Adda)                                                                                                                                                              | 1                   | Copper                                                   | Italy                        | Growth chamber                     | 21               |
| Borghi et al. 2008      | Environmental and Experimental Botany        | - <i>P. alba</i> L.<br>- <i>P. x Canadensis</i> ( <i>P. nigra</i> L. x <i>P. deltoides</i> W.Bartram)                                                                                                                                                    | 2                   | Copper                                                   | Italy                        | Growth chamber                     | 18               |
| Calfapietra et al. 2005 | Environmental pollution                      | <i>P. x euramericana</i> ( <i>P. deltoides</i> W.Bartram x <i>P. nigra</i> L.)                                                                                                                                                                           | 1                   | Nitrogen & ambient CO <sub>2</sub> & canopy level        | Italy                        | Plantation                         | 60               |
| Castagna et al. 2015    | Environmental Science and Pollution Research | - <i>P. x canadensis</i> ( <i>P. nigra</i> L. x <i>P. deltoides</i> W.Bartram)<br>- <i>P. deltoides</i> W.Bartram x <i>P. maximowiczii</i> A.Henry                                                                                                       | 2                   | Ozone & cadmium soil contamination                       | Italy                        | Greenhouse                         | 16               |
| Di Baccio et al. 2009   | Environmental and Experimental Botany        | <i>P. x euramericana</i> ( <i>P. deltoides</i> W.Bartram x <i>P. nigra</i> L.) (clone i-214)                                                                                                                                                             | 1                   | Zinc soil contamination                                  | Italy                        | Growth chamber                     | 12               |
| Elferjani et al. 2016   | Environmental and Experimental Botany        | - <i>P. trichocarpa</i> Torr. & A.Gray x <i>P. balsamifera</i> L. (clone 747215)<br>- <i>P. balsamifera</i> L. x <i>P. maximowiczii</i> A.Henry (clones 915004 and 915005)<br>- <i>P. maximowiczii</i> A.Henry x <i>P. balsamifera</i> L. (clone 915319) | 4                   | Latitudinal gradient                                     | Canada                       | Plantation                         | 24               |
| Li et al. 2013          | Tree Physiology                              | <i>P. euphratica</i> Oliv.                                                                                                                                                                                                                               | 1                   | Ground water availability                                | China                        | In field under shelter (lysimeter) | 9                |
| Merilo et al. 2010      | Baltic Forestry                              | - <i>P. nigra</i> L.<br>- <i>P. alba</i> L.                                                                                                                                                                                                              | 2                   | Ambient CO <sub>2</sub> (FACE) & nitrogen & canopy level | Italy                        | Plantation                         | 104              |
| Niinemets et al. 1998   | Tree Physiology                              | <i>P. tremula</i> L.                                                                                                                                                                                                                                     | 1                   | Canopy level                                             | Estonia                      | Natural forest stands              | 14               |
| Ripullone et al. 2003   | Tree Physiology                              | <i>P. x euramericana</i> ( <i>P. deltoides</i> W.Bartram x <i>P. nigra</i> L.) (clone i-214)                                                                                                                                                             | 1                   | Nitrogen                                                 | Italy                        | Greenhouse                         | 14               |
| Ryan et al. 2009        | Plant, Cell and Environment                  | <i>P. deltoides</i> W.Bartram x <i>P. trichocarpa</i> Torr. & A.Gray                                                                                                                                                                                     | 2                   | Ozone                                                    | United Kingdom               | Greenhouse                         | 118              |
| Silim et al. 2010       | Photosynthetic Research                      | <i>P. balsamifera</i> L.                                                                                                                                                                                                                                 | 1                   | Habitat & growth temperature                             | Canada                       | Greenhouse                         | 30               |

|                                |                                |                                                                                                                                                                                                                                                                                                                                                                                                                                                                                                                      |    |                                       |           |                                  |    |
|--------------------------------|--------------------------------|----------------------------------------------------------------------------------------------------------------------------------------------------------------------------------------------------------------------------------------------------------------------------------------------------------------------------------------------------------------------------------------------------------------------------------------------------------------------------------------------------------------------|----|---------------------------------------|-----------|----------------------------------|----|
| Soolanayakanahally et al. 2009 | Plant, Cell and Environment    | <i>P. balsamifera</i> L.                                                                                                                                                                                                                                                                                                                                                                                                                                                                                             | 1  | Latitudinal gradient                  | Canada    | Greenhouse                       | 72 |
| Théroux-Rancourt et al.        | Unpublished data               | - <i>P. deltoides</i> W.Bartram × <i>P. nigra</i> L. (clone 3570)<br>- <i>P. maximowiczii</i> A.Henry × ( <i>P. deltoides</i> W.Bartram × <i>P. trichocarpa</i> Torr. & A.Gray) (clones 505372 and 505508)<br>- <i>P. maximowiczii</i> A.Henry × <i>P. trichocarpa</i> Torr. & A.Gray (clone 750361)<br>- <i>P. maximowiczii</i> A.Henry × <i>P. balsamifera</i> L. (clones 915302, 915313, 915318)<br>- ( <i>P. deltoides</i> W.Bartram × <i>P. nigra</i> L.) × <i>P. trichocarpa</i> Torr. & A.Gray (clone 915508) | 8  | N/A                                   | Canada    | Greenhouse                       | 38 |
| Théroux-Rancourt et al. 2014   | Journal of Experimental Botany | - Assiniboine: [( <i>P.</i> × ' <i>Walker</i> ': <i>P. deltoides</i> W.Bartram × <i>P. x petrowskiana</i> R.I. Schrod. ex Regel) × male parent unknown]<br>- Okanese [( <i>P.</i> × ' <i>Walker</i> ') × <i>P. x petrowskiana</i> R.I. Schrod. ex Regel]                                                                                                                                                                                                                                                             | 2  | Water stress                          | Canada    | Greenhouse and growth chamber    | 3  |
| Théroux-Rancourt et al. 2015   | Tree Physiology                | - ( <i>P. maximowiczii</i> A. Henry) × ( <i>P. deltoides</i> W. Bartram × <i>P. trichocarpa</i> Torr. & A. Gray)<br>- <i>P. maximowiczii</i> A.Henry × <i>P. balsamifera</i> L.<br>- ' <i>Walker</i> ' [ <i>P. deltoides</i> W.Bartram × ( <i>P. laurifolia</i> Ledeb. × <i>P. nigra</i> L.)] × <i>P. deltoides</i> W.Bartram<br>- ' <i>Walker</i> ' × <i>P. petrowskyana</i> Schr.<br>- <i>P. balsamifera</i> L.                                                                                                    | 5  | Water stress                          | Canada    | Greenhouse and growth chamber    | 12 |
| Tissue et al. 2010             | Tree Physiology                | <i>P. deltoides</i> W.Bartram                                                                                                                                                                                                                                                                                                                                                                                                                                                                                        | 1  | Phosphorous & ambient CO <sub>2</sub> | Australia | Growth chamber                   | 76 |
| Tognetti et al.                | Unpublished data               | <i>P. x euramericana</i> ( <i>P. nigra</i> L. × <i>P. deltoides</i> W. Bartram) (clone i-214)                                                                                                                                                                                                                                                                                                                                                                                                                        |    | Zinc soil contamination               | Italy     | Greenhouse                       | 24 |
| Tognetti et al. 2004           | Tree Physiology                | - <i>P. deltoides</i> W.Bartram × <i>P. maximowiczii</i> A.Henry<br>- <i>P. x euramericana</i> ( <i>P. deltoides</i> W.Bartram × <i>P. nigra</i> L.) (clone i-214)                                                                                                                                                                                                                                                                                                                                                   | 2  | Heavy metals                          | Italy     | Greenhouse                       | 24 |
| Tosens et al. 2012             | Plant, Cell and Environment    | <i>P. tremula</i> L.                                                                                                                                                                                                                                                                                                                                                                                                                                                                                                 | 1  | Light & water stress                  | Estonia   | Growth chamber                   | 8  |
| Velikova et al. 2011           | Environmental Pollution        | <i>P. nigra</i> L.                                                                                                                                                                                                                                                                                                                                                                                                                                                                                                   | 20 | Nickel soil contamination             | Italy     | Growth chamber (climate chamber) | 16 |
| Xu et al. 2020                 | Tree Physiology                | <i>P. x euramericana</i> ( <i>P. deltoides</i> W.Bartram × <i>P. nigra</i> L.) (cv. '74/76')                                                                                                                                                                                                                                                                                                                                                                                                                         | 1  | Nitrogen & ozone                      | China     | Growth chamber                   | 6  |

## Figure legends

**Figure 1.** Cumulative number of published studies for mesophyll conductance ( $g_m$ ) between the years 2000 to 2020. Number of publications were determined using keywords (e.g.  $g_m$ ) through database search available at the Web of Science Core Collection.

(<https://clarivate.com/webofsciencegroup/solutions/web-of-science-core-collection/>).

**Figure 2.** Cumulative number of published studies for mesophyll conductance ( $g_m$ ) in *Populus* spp. between the years 2001 to 2020. Number of publications were determined using keywords (e.g. *Populus*) through database search available at the Web of Science Core Collection.

(<https://clarivate.com/webofsciencegroup/solutions/web-of-science-core-collection/>).

**Figure 3.** Effect of the leaf position in the canopy (Bottom: Bot, Middle: Mid, Upper: Upp) on light-saturated photosynthetic rate ( $A_{max}$ , a); stomatal conductance ( $g_s$ , b); mesophyll conductance ( $g_m$ , c);  $g_m/g_s$  ratio (d); maximum rate of carboxylation ( $V_{cmax}$ , e) and specific leaf area (SLA, f). In  $g_m/g_s$  ratio,  $g_s$  for water ( $\text{mol H}_2\text{O m}^{-2} \text{s}^{-1}$ ) was divided by 1.6 to obtain  $g_s$  in  $\text{mol CO}_2 \text{m}^{-2} \text{s}^{-1}$ . Means having the same letters are not significantly different at  $\alpha = 0.05$ .

**Figure 4.** Effect of the ambient air  $\text{CO}_2$  concentration on light-saturated photosynthetic rate ( $A_{max}$ , a); stomatal conductance ( $g_s$ , b); mesophyll conductance ( $g_m$ , c) and  $g_m/g_s$  ratio (d). In  $g_m/g_s$  ratio,  $g_s$  for water ( $\text{mol H}_2\text{O m}^{-2} \text{s}^{-1}$ ) was divided by 1.6 to obtain  $g_s$  in  $\text{mol CO}_2 \text{m}^{-2} \text{s}^{-1}$ . Means having the same letters are not significantly different at  $\alpha = 0.05$ .

**Figure 5.** Effect of the soil Copper (Cu) concentration on light-saturated photosynthetic rate ( $A_{max}$ , a); stomatal conductance ( $g_s$ , b); mesophyll conductance ( $g_m$ , c) and  $g_m/g_s$  ratio (d). In  $g_m/g_s$  ratio,  $g_s$  for water ( $\text{mol H}_2\text{O m}^{-2} \text{s}^{-1}$ ) was divided by 1.6 to obtain  $g_s$  in  $\text{mol CO}_2 \text{m}^{-2} \text{s}^{-1}$ . Means having the same letters are not significantly different at  $\alpha = 0.05$ .

**Figure 6.** Effect of the soil nitrogen content (high nitrogen: HN, low nitrogen: LN) on light-saturated photosynthetic rate ( $A_{max}$ , a); stomatal conductance ( $g_s$ , b); mesophyll conductance ( $g_m$ , c) and  $g_m/g_s$  ratio (d). In  $g_m/g_s$  ratio,  $g_s$  for water ( $\text{mol H}_2\text{O m}^{-2} \text{s}^{-1}$ ) was divided by 1.6 to obtain  $g_s$  in  $\text{mol CO}_2 \text{m}^{-2} \text{s}^{-1}$ . Means having the same letters are not significantly different at  $\alpha = 0.05$ .

**Figure 7.** Effect of the soil moisture on light-saturated photosynthetic rate ( $A_{max}$ , a); stomatal conductance ( $g_s$ , b); mesophyll conductance ( $g_m$ , c) and  $g_m/g_s$  ratio (d). In  $g_m/g_s$  ratio,  $g_s$  for water ( $\text{mol H}_2\text{O m}^{-2} \text{s}^{-1}$ ) was divided by 1.6 to obtain  $g_s$  in  $\text{mol CO}_2 \text{m}^{-2} \text{s}^{-1}$ . Means having the same letters are not significantly different at  $\alpha = 0.05$ .

**Figure 8.** Relationship between light-saturated photosynthetic rate ( $A_{max}$ ), stomatal conductance ( $g_s$ ), mesophyll conductance ( $g_m$ ), maximum rate of carboxylation ( $V_{cmax}$ ), electron transport rate ( $J$ ),  $g_m/g_s$  ratio, specific leaf area (SLA) and per area leaf Nitrogen concentration ( $N_{area}$ ). In  $g_m/g_s$  ratio,  $g_s$  for water ( $\text{mol H}_2\text{O m}^{-2} \text{s}^{-1}$ ) was divided by 1.6 to obtain  $g_s$  in  $\text{mol CO}_2 \text{m}^{-2} \text{s}^{-1}$ .



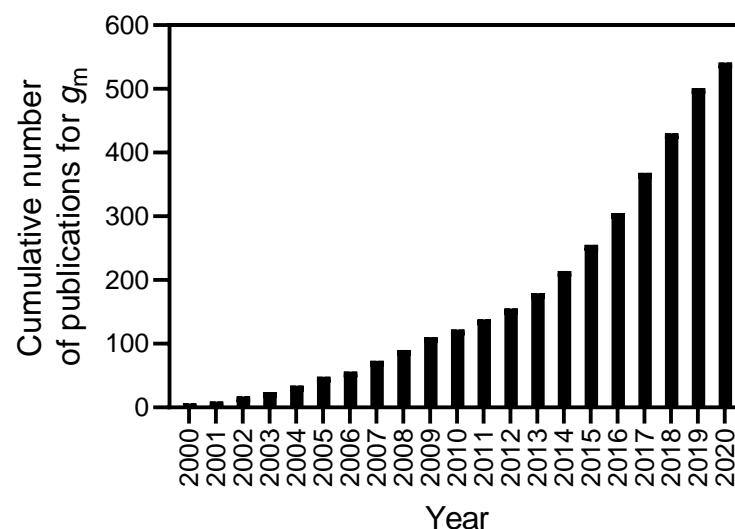

**Figure 1.** Cumulative number of published studies for mesophyll conductance ( $g_m$ ) between the years 2000 to 2020. Number of publications were determined using keywords (e.g.  $g_m$ ) through database search available at the Web of Science Core Collection (<https://clarivate.com/webofsciencegroup/solutions/web-of-science-core-collection/>).

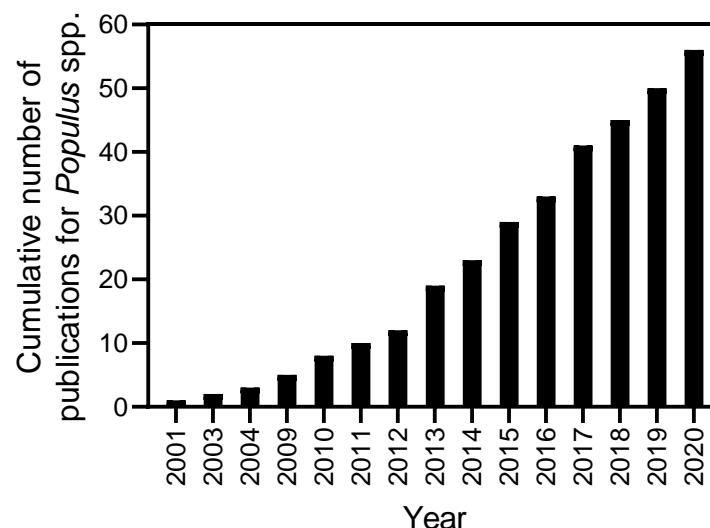

**Figure 2.** Cumulative number of published studies for mesophyll conductance ( $g_m$ ) in *Populus* spp. between the years 2001 to 2020. Number of publications were determined using keywords (e.g. *Populus*) through database search available at the Web of Science Core Collection. (<https://clarivate.com/webofsciencegroup/solutions/web-of-science-core-collection/>).

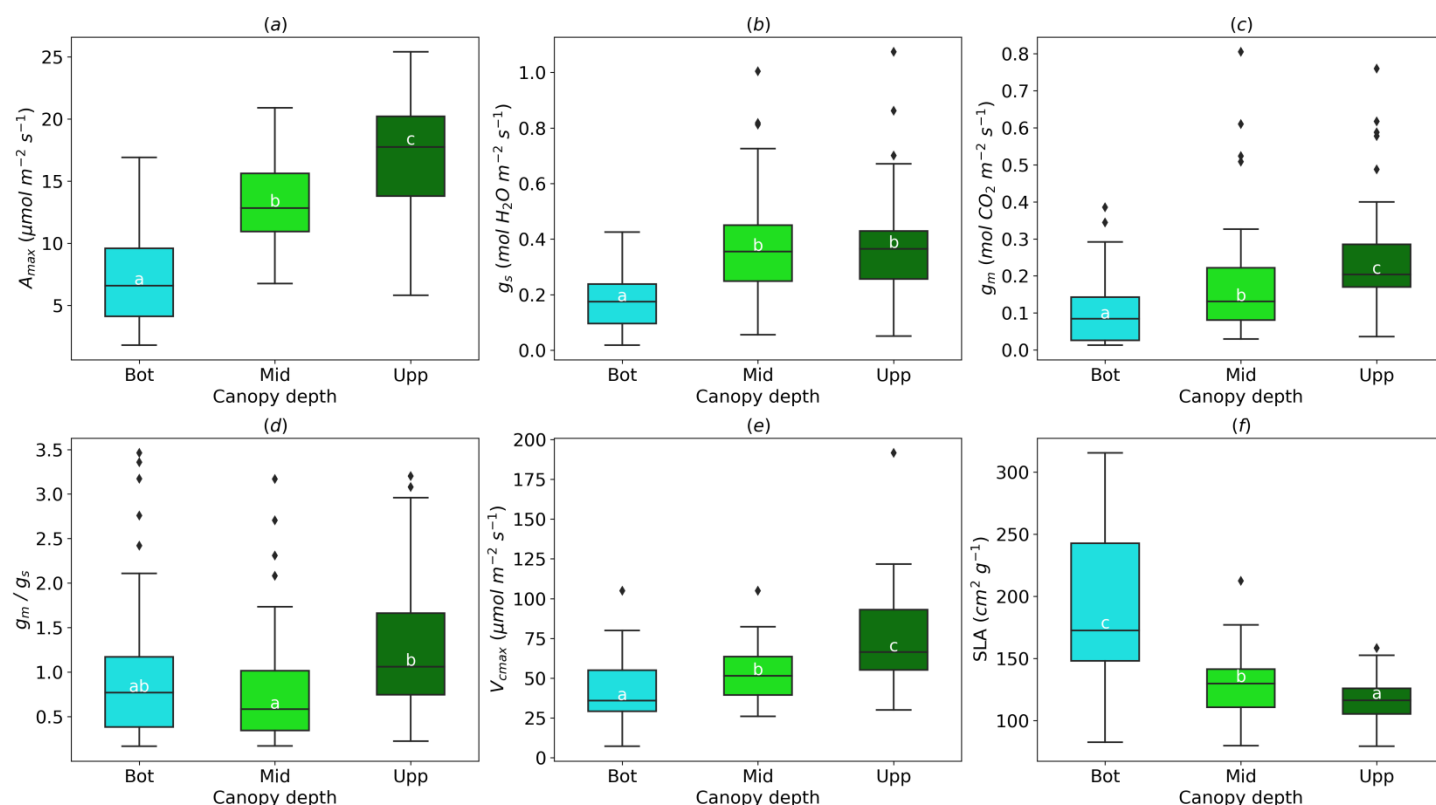

**Figure 3.** Effect of the leaf position in the canopy (Bottom: Bot, Middle: Mid, Upper: Upp) on light-saturated photosynthetic rate ( $A_{max}$ , a); stomatal conductance ( $g_s$ , b); mesophyll conductance ( $g_m$ , c);  $g_m/g_s$  ratio (d); maximum rate of carboxylation ( $V_{cmax}$ , e) and specific leaf area ( $SLA$ , f). In  $g_m/g_s$  ratio,  $g_s$  for water ( $\text{mol H}_2\text{O m}^{-2} \text{s}^{-1}$ ) was divided by 1.6 to obtain  $g_s$  in  $\text{mol CO}_2 \text{m}^{-2} \text{s}^{-1}$ . Means having the same letters are not significantly different at  $\alpha = 0.05$ .

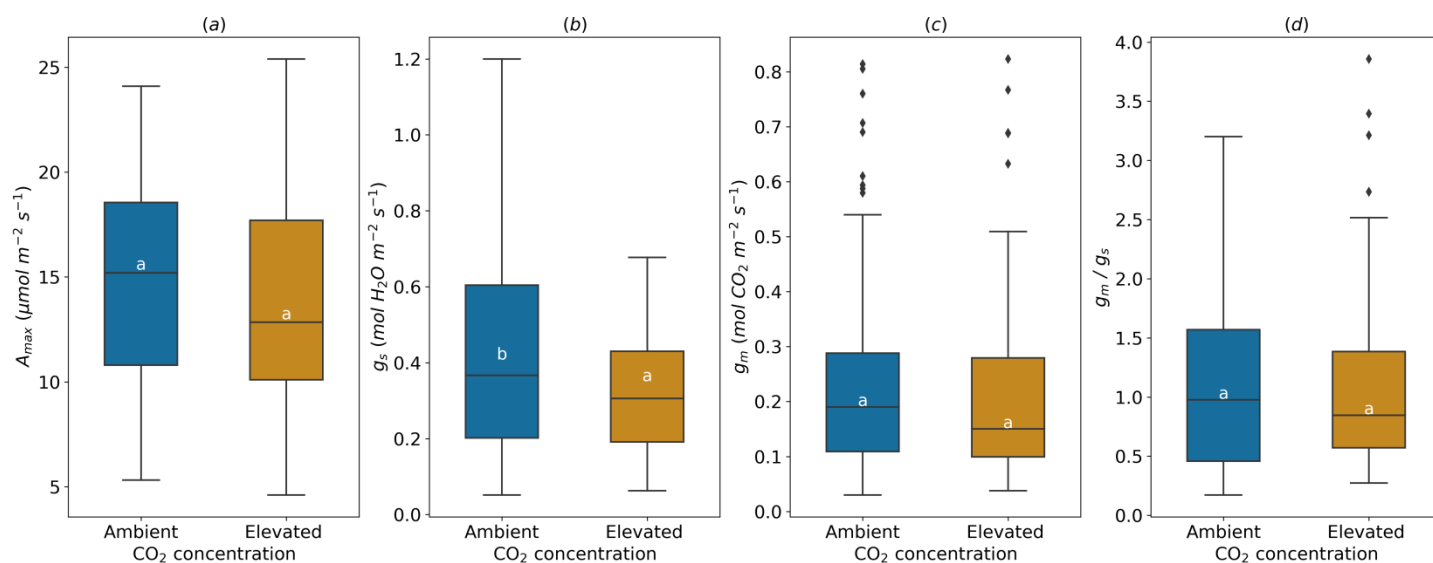

**Figure 4.** Effect of the ambient air CO<sub>2</sub> concentration on light-saturated photosynthetic rate ( $A_{max}$ , a); stomatal conductance ( $g_s$ , b); mesophyll conductance ( $g_m$ , c) and  $g_m/g_s$  ratio (d). In  $g_m/g_s$  ratio,  $g_s$  for water ( $\text{mol H}_2\text{O m}^{-2} \text{s}^{-1}$ ) was divided by 1.6 to obtain  $g_s$  in  $\text{mol CO}_2 \text{m}^{-2} \text{s}^{-1}$ . Means having the same letters are not significantly different at  $\alpha = 0.05$ .

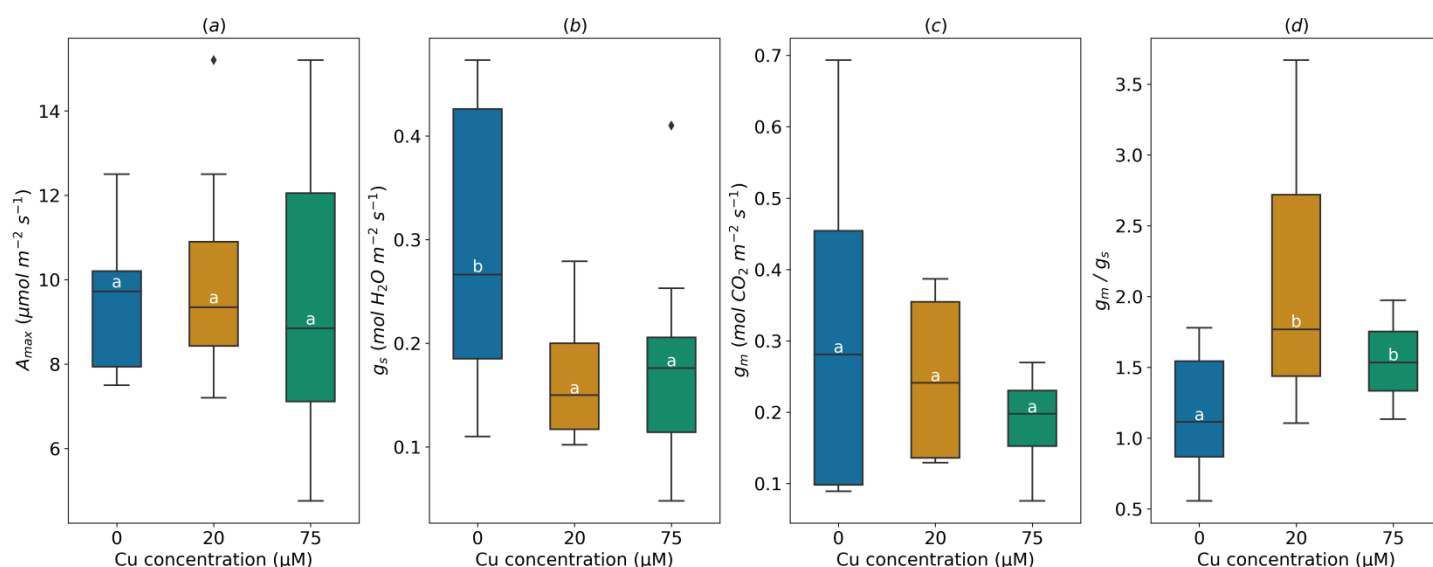

**Figure 5.** Effect of the soil Copper (Cu) concentration on light-saturated photosynthetic rate ( $A_{max}$ , a); stomatal conductance ( $g_s$ , b); mesophyll conductance ( $g_m$ , c) and  $g_m/g_s$  ratio (d). In  $g_m/g_s$  ratio,  $g_s$  for water ( $\text{mol H}_2\text{O m}^{-2} \text{s}^{-1}$ ) was divided by 1.6 to obtain  $g_s$  in  $\text{mol CO}_2 \text{m}^{-2} \text{s}^{-1}$ . Means having the same letters are not significantly different at  $\alpha = 0.05$ .

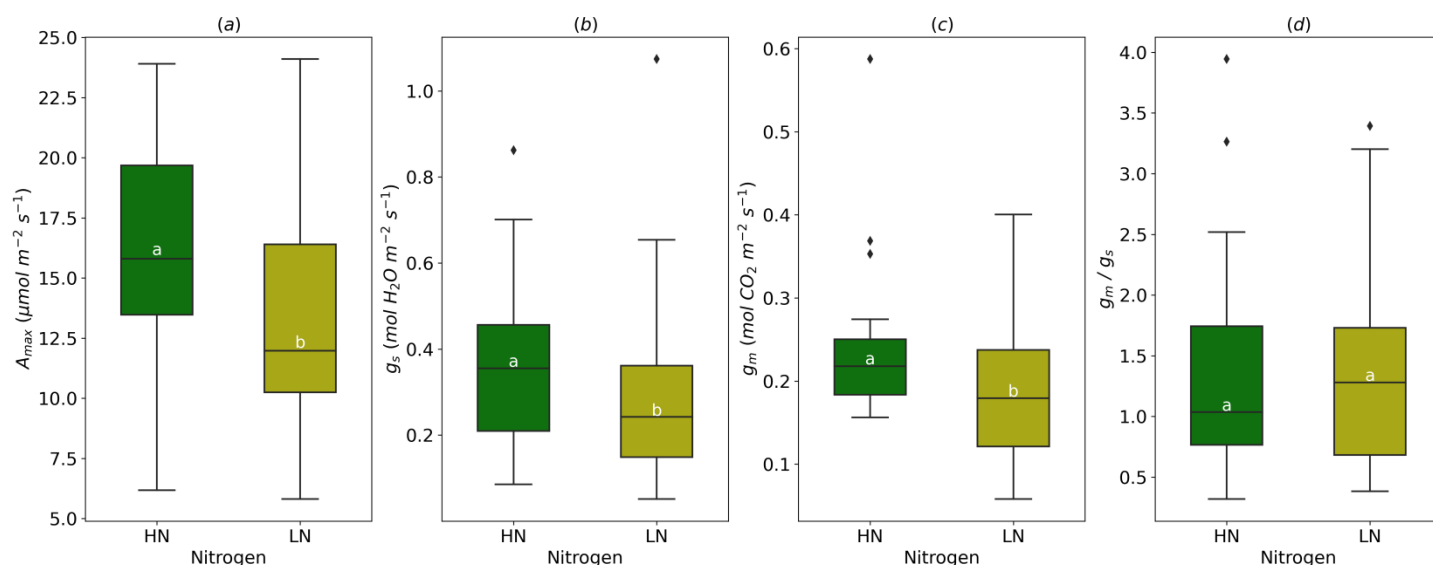

**Figure 6.** Effect of the soil nitrogen content (high nitrogen: HN, low nitrogen: LN) on light-saturated photosynthetic rate ( $A_{max}$ , a); stomatal conductance ( $g_s$ , b); mesophyll conductance ( $g_m$ , c) and  $g_m/g_s$  ratio (d). In  $g_m/g_s$  ratio,  $g_s$  for water ( $\text{mol H}_2\text{O m}^{-2} \text{s}^{-1}$ ) was divided by 1.6 to obtain  $g_s$  in  $\text{mol CO}_2 \text{m}^{-2} \text{s}^{-1}$ . Means having the same letters are not significantly different at  $\alpha = 0.05$ .

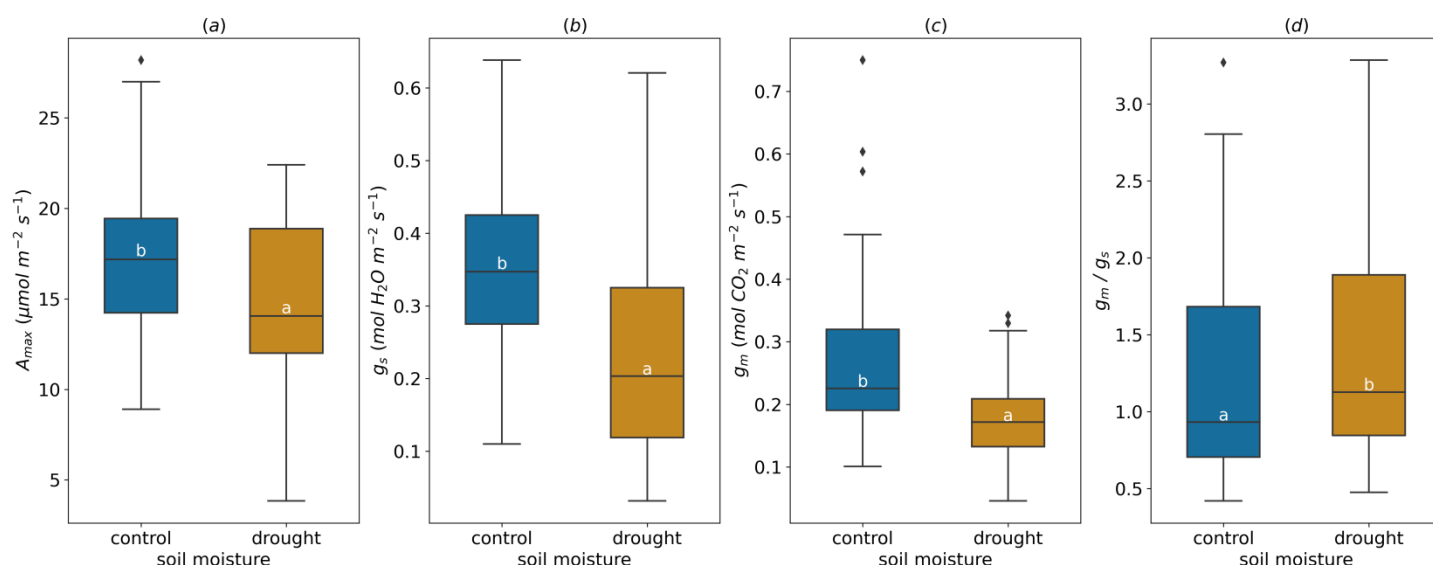

**Figure 7.** Effect of the soil moisture on light-saturated photosynthetic rate ( $A_{max}$ , a); stomatal conductance ( $g_s$ , b); mesophyll conductance ( $g_m$ , c) and  $g_m/g_s$  ratio (d). In  $g_m/g_s$  ratio,  $g_s$  for water ( $\text{mol H}_2\text{O m}^{-2} \text{s}^{-1}$ ) was divided by 1.6 to obtain  $g_s$  in  $\text{mol CO}_2 \text{m}^{-2} \text{s}^{-1}$ . Means having the same letters are not significantly different at  $\alpha = 0.05$ .

a)

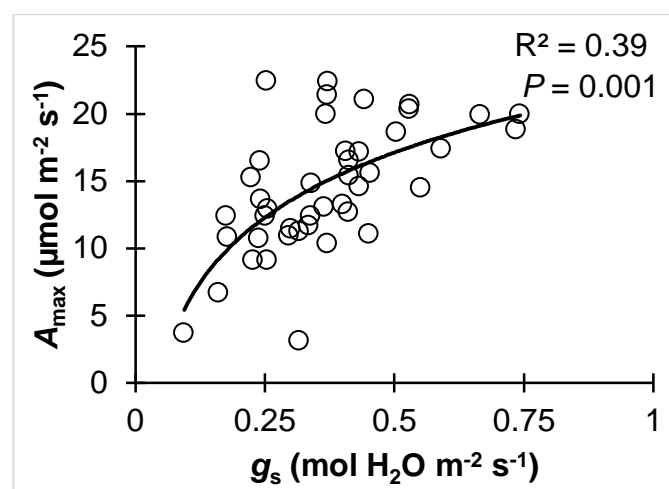

b)

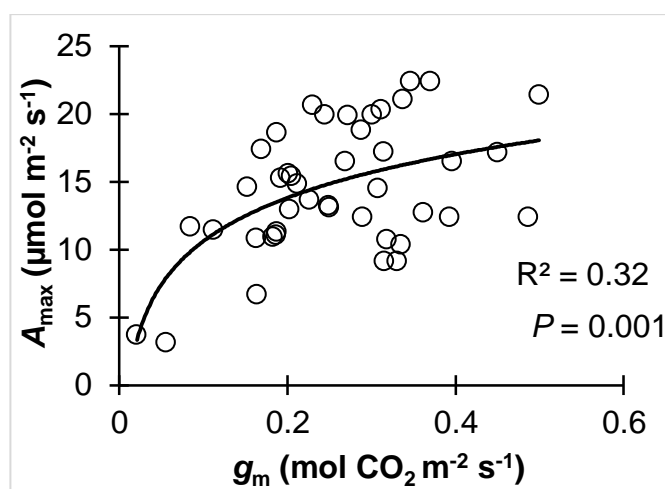

c)

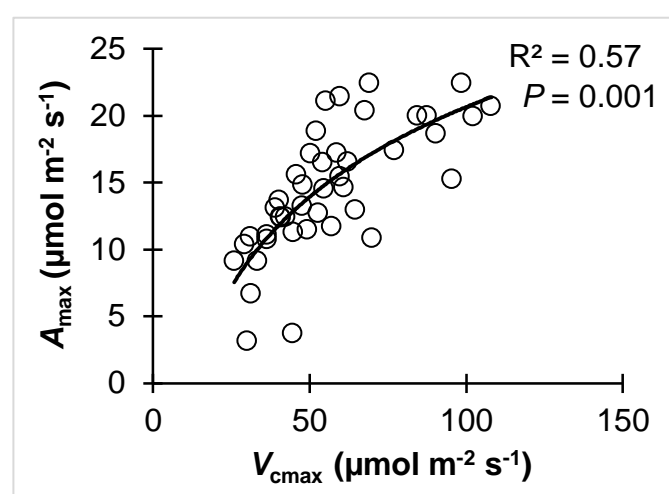

d)

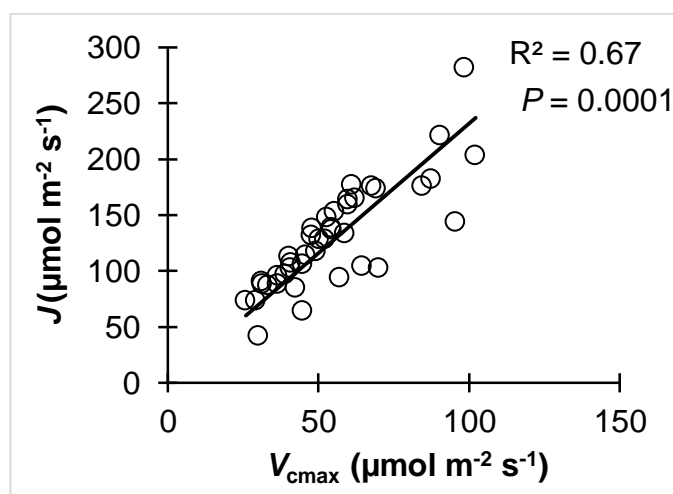

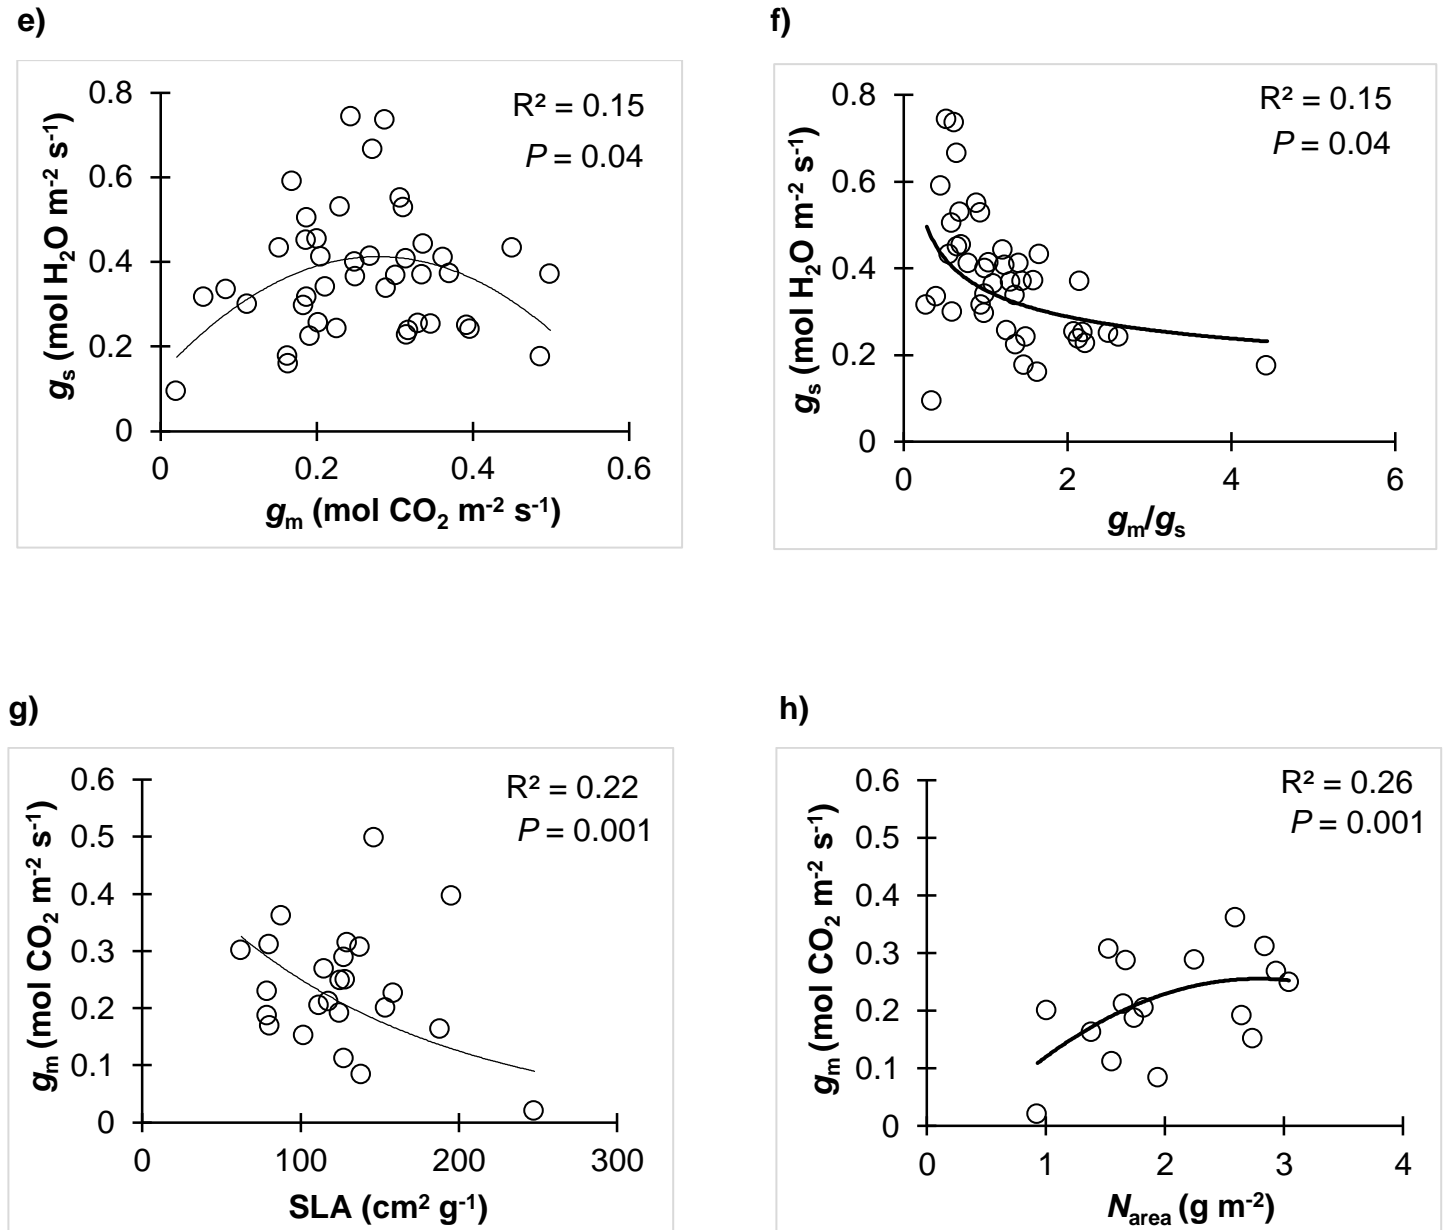

**Figure 8.** Relationship between light-saturated photosynthetic rate ( $A_{max}$ ), stomatal conductance ( $g_s$ ), mesophyll conductance ( $g_m$ ), maximum rate of carboxylation ( $V_{cmax}$ ), electron transport rate ( $J$ ),  $g_m/g_s$  ratio, specific leaf area (SLA) and per area leaf Nitrogen concentration ( $N_{area}$ ). In  $g_m/g_s$  ratio,  $g_s$  for water (mol H<sub>2</sub>O m<sup>-2</sup> s<sup>-1</sup>) was divided by 1.6 to obtain  $g_s$  in mol CO<sub>2</sub> m<sup>-2</sup> s<sup>-1</sup>.
